1 ***Mycobacterium tuberculosis*-specific CD4<sup>+</sup> and CD8<sup>+</sup> T cells differ in their capacity to**  
2 **recognize infected macrophages**

3

4

5 Jason Yang<sup>1</sup>, Daniel Mott<sup>1</sup>, Rujapak Sutiwisesak<sup>1</sup>, Yu Jung Lu<sup>1</sup>, Fiona Raso<sup>1</sup>, Britni Stowell<sup>1</sup>, Greg  
6 Babunovic<sup>2</sup>, Jinhee Lee<sup>1</sup>, Steve Carpenter<sup>1</sup>, Sing Sing Way<sup>3</sup>, Sarah Fortune<sup>2</sup>, Sam Behar<sup>1</sup>

7

8 1. Department of Microbiology and Physiological Systems, University of Massachusetts Medical  
9 School, Worcester, Massachusetts, USA.

10 2. Department of Immunology and Infectious Diseases, Harvard T.H. Chan School of Public  
11 Health, Boston, Massachusetts, USA.

12 3. Division of Infectious Disease, Cincinnati Children's Hospital, Cincinnati, Ohio, USA

13

14

15 Correspondence:

16 Samuel M. Behar

17 E-mail address: [samuel.behar@umassmed.edu](mailto:samuel.behar@umassmed.edu) (SMB)

18

## 19 **Abstract**

20           Containment of *Mycobacterium tuberculosis* (Mtb) infection requires T cell recognition of  
21 infected macrophages. Mtb has evolved to tolerate, evade, and subvert host immunity. Despite a  
22 vigorous and sustained CD8<sup>+</sup> T cell response during Mtb infection, CD8<sup>+</sup> T cells make limited  
23 contribution to protection. Here, we ask whether the ability of Mtb-specific T cells to restrict Mtb  
24 growth is related to their capacity to recognize Mtb-infected macrophages.

25           We derived CD8<sup>+</sup> T cell lines that recognized the Mtb immunodominant epitope TB10.4<sub>11</sub>  
26 and compared them to CD4<sup>+</sup> T cell lines that recognized Ag85b<sub>240-254</sub> or ESAT6<sub>3-17</sub>. While the  
27 CD4<sup>+</sup> T cells recognized Mtb-infected macrophages and inhibited Mtb growth in vitro, the TB10.4-  
28 specific CD8<sup>+</sup> T cells neither recognized Mtb-infected macrophages nor restricted Mtb growth.  
29 TB10.4-specific CD8<sup>+</sup> T cells recognized macrophages infected with *Listeria monocytogenes*  
30 expressing TB10.4. However, over-expression of TB10.4 in Mtb did not confer recognition by  
31 TB10.4-specific CD8<sup>+</sup> T cells. Importantly, CD8<sup>+</sup> T cells recognized macrophages pulsed with  
32 irradiated Mtb, indicating that macrophages can efficiently cross-present the TB10.4 protein and  
33 raising the possibility that viable bacilli might suppress cross-presentation. Importantly, polyclonal  
34 CD8<sup>+</sup> T cells specific for Mtb antigens other than TB10.4 recognized Mtb-infected macrophages  
35 in a MHC-restricted manner.

36           As TB10.4 elicits a dominant CD8<sup>+</sup> T cell response that poorly recognizes Mtb-infected  
37 macrophages, we propose that TB10.4 acts as a decoy antigen. Moreover, it appears that this  
38 response overshadows subdominant CD8<sup>+</sup> T cell response that can recognize Mtb-infected  
39 macrophages. The ability of Mtb to subvert the CD8<sup>+</sup> T cell response may explain why CD8<sup>+</sup> T  
40 cells make a disproportionately small contribution to host defense compared to CD4<sup>+</sup> T cells. The  
41 selection of Mtb antigens for vaccines has focused on antigens that generate immunodominant  
42 responses. We propose that establishing whether vaccine-elicited, Mtb-specific T cells recognize  
43 Mtb-infected macrophages could be a useful criterion for preclinical vaccine development.

## 44 **Introduction**

45           Unlike most disease-causing pathogens, *Mycobacterium tuberculosis* (Mtb), the cause of  
46 tuberculosis (TB), persists in humans because of its highly evolved ability to evade and subvert  
47 the host immunity [1]. Mtb subverts vesicular trafficking, prevents phagolysosome fusion, and  
48 replicates in an intracellular niche within macrophages, allowing it to evade detection by humoral  
49 immunity [2]. Mtb also delays the initiation and recruitment of T cell immunity to the lung,  
50 promoting the establishment of a persistent infection [3]. Despite these challenges, T cell  
51 immunity does occur and plays an essential role in controlling the infection in both mice and  
52 humans [3-5]. With 10 million new TB cases annually, an effective vaccine would offer a cost-  
53 effective way to prevent TB and attenuate this persistent global pandemic. Given the importance  
54 of T cells during host defense, strategies for TB vaccines largely aim at generating memory T  
55 cells rather than neutralizing antibodies. Most subunit vaccines incorporate immunodominant Mtb  
56 antigens, which elicit large T cell responses [6]. Several immunodominant antigens have been  
57 identified in the murine TB model, including Ag85a, Ag85b, CFP-10, ESAT-6 and TB10.4 [7]. T  
58 cell responses to these antigens are also frequently detectable in Mtb-infected people, and these  
59 highly prevalent responses represent the basis for TB immunodiagnostic tests [8]. By  
60 incorporating these immunodominant antigens into vaccines, the expectation is that antigen-  
61 specific T cells will contain the infection before Mtb can establish a niche and evade host immunity  
62 [6].

63           T cell recognition of Mtb-infected macrophages is fundamental to containment of TB  
64 infection. Srivastava et al elegantly showed this by using mixed bone marrow (BM) chimeric mice  
65 made from wild type (WT) and major histocompatibility complex class II (MHC class II) deficient  
66 BM [9]. Following infection, polyclonal CD4<sup>+</sup> T cells suppressed Mtb growth more efficiently in  
67 MHC class II-expressing cells than in MHC class II-deficient cells. This data convincingly argues  
68 that cognate recognition (i.e., T cell receptor (TCR) mediated recognition), of infected cells by

69 polyclonal CD4<sup>+</sup> T cells limits bacterial growth. However, whether this protection comes from T  
70 cells recognizing immunodominant or subdominant antigens remains unknown. In fact, even  
71 though many presume that Mtb-infected cells present immunodominant antigens, the data  
72 validating this assumption is surprisingly inconsistent. While there is consensus that Mtb-infected  
73 cells present ESAT-6, the data concerning Ag85b presentation is more complicated [10-13].  
74 Ag85b<sub>241-256</sub> elicits a CD4<sup>+</sup> T cell response early after infection, but Mtb reduces Ag85b  
75 production within three weeks after in vivo infection [12]. Thus, while Ag85b<sub>241-256</sub>-specific CD4<sup>+</sup>  
76 T cells can recognize dendritic cells (DC) from infected mice 14 days post infection [14], there is  
77 little recognition of Mtb-infected cells by Ag85b<sub>241-256</sub>-specific CD4<sup>+</sup> T cells in vivo by day 21 [12].  
78 Furthermore, Mtb has other mechanisms to evade T cell recognition, including dysregulating MHC  
79 class II expression and inhibiting antigen presentation by stimulating antigen export by the  
80 infected antigen presenting cells (APCs) [1, 12, 13, 15]. Whether the immunodominant antigens  
81 recognized by CD8<sup>+</sup> T cells are presented by Mtb-infected macrophages remains unknown. Here,  
82 we investigated cognate T cell recognition of Mtb-infected macrophages by CD8<sup>+</sup> T cells specific  
83 to the immunodominant antigen TB10.4.

84 TB10.4 (EsxH) is an ESAT-6-like protein secreted by the ESX-3 type VII secretion system,  
85 important in iron and zinc acquisition, and essential for Mtb growth in vitro and in vivo [16, 17].  
86 Following Mtb infection, TB10.4 is a target of CD4<sup>+</sup> and CD8<sup>+</sup> T cell responses in humans and  
87 mice [18-22]. In Mtb-infected mice, TB10.4 elicits immunodominant responses in both BALB/c  
88 and C57BL/6 mice, and 30-50% of lung CD8<sup>+</sup> T cells are specific to single epitopes (S1 Fig) [18,  
89 19]. Whether these TB10.4-specific CD8<sup>+</sup> T cells can mediate protection is unclear. Adoptive  
90 transfer of TB10.4-specific CD8<sup>+</sup> T cells into Mtb-infected, immunocompromised mice reduces  
91 the bacterial burden and promotes survival [19]. However, despite eliciting large numbers of  
92 TB10.4-specific CD8<sup>+</sup> T cells, a vaccine incorporating the H-2 K<sup>b</sup>-restricted epitope, TB10.4<sub>4-11</sub>,  
93 failed to protect mice from Mtb infection [23]. We hypothesize that the inability of TB10.4-specific

94 CD8<sup>+</sup> T cells to mediate protection is due to inefficient recognition of Mtb-infected macrophages.

95 We used primary CD4<sup>+</sup> and CD8<sup>+</sup> T cells lines to investigate the recognition of Mtb-infected  
96 macrophages by T cells specific to Ag85b, ESAT-6, or TB10.4. Ag85b- and ESAT-6-specific CD4<sup>+</sup>  
97 T cells recognized Mtb-infected macrophages, but under the same conditions, TB10-specific  
98 CD8<sup>+</sup> T cells did not recognize infected macrophages or inhibit bacterial growth. This was true  
99 even upon examination of numerous conditions and permutations including length of infection,  
100 duration of T cell and macrophage co-culture, and multiplicity of infection. TB10.4-specific CD8<sup>+</sup>  
101 T cells did recognize macrophages infected with recombinant *Listeria monocytogenes* expressing  
102 TB10.4, but only if the bacilli could escape into the cytosol. However, overexpressing TB10.4 in  
103 Mtb did not confer recognition. Importantly, macrophages pulsed with irradiated bacteria efficiently  
104 cross-presented TB10.4 to CD8<sup>+</sup> T cells, suggesting that live Mtb actively inhibited presentation.  
105 Interestingly, polyclonal CD8<sup>+</sup> T cells specific for Mtb antigens other than TB10.4 recognized Mtb-  
106 infected macrophages in a MHC class I-restricted manner. Thus, while TB10.4-specific CD8<sup>+</sup> T  
107 cells do not recognize Mtb-infected macrophages, there exist other CD8<sup>+</sup> T cells that recognize  
108 subdominant antigens presented by Mtb-infected cells. Based on these data, we propose that  
109 TB10.4 is a decoy antigen: it elicits a massive and persistent CD8<sup>+</sup> T cell response, which cannot  
110 recognize Mtb-infected macrophages. Such a decoy antigen may distract the CD8 response from  
111 focusing on subdominant antigens presented by infected cells, leading to evasion from host  
112 immunity.

113

## 114 **Results**

### 115 **TB10.4-specific CD8<sup>+</sup> and Ag85b-specific CD4<sup>+</sup> T cell lines sensitively recognize** 116 **their cognate antigens.**

117 To study T cell recognition of Mtb-infected macrophages, we established antigen-specific  
118 T cell lines, which unlike T cell hybridomas, facilitate the study of T cell function as well as  
119 recognition. The TB10.4<sub>4-11</sub>-specific CD8<sup>+</sup> T cell line, referred hereafter as TB10Rg3, has a distinct  
120 TCR cloned originally from TB10.4<sub>4-11</sub>-tetramer<sup>+</sup> CD8<sup>+</sup> T cells isolated from infected mice and  
121 expressed in retrogenic mice [19]. The Ag85b<sub>240-254</sub>-specific CD4<sup>+</sup> T cell line, referred hereafter as  
122 P25 cells, was derived from P25 TCR transgenic mice [24]. To confirm their antigen-specificity,  
123 we co-cultured the P25 or TB10Rg3 T cells with thioglycolate-elicited peritoneal macrophages  
124 (TGPMs) pulsed with or without their cognate peptides and then measured their expression of  
125 CD69 and Nur77. While both CD69 and Nur77 are T cell activation markers, increases in Nur77  
126 expression indicate TCR-mediated activation more specifically [25, 26]. After co-culture with  
127 TGPMs pulsed with Ag85b<sub>241-256</sub> peptide, Nur77 expression by P25 cells peaked after 2 hours  
128 (Fig 1a, b), while CD69 expression continued to increase (Fig 1c, d). TB10Rg3 T cells exhibited  
129 similar Nur77 and CD69 expression patterns after their co-culture with TGPMs pulsed with the  
130 TB10.4<sub>4-11</sub> peptide (IMYNYPPAM) but not with a control peptide (IMANAPAM) (Fig 1e-h). Since the  
131 increase in Nur77 expression was transient, we next tested whether CD69 and IFN $\gamma$  could be  
132 useful markers of antigen recognition for longer experiments. During 72 hours of co-culture with  
133 peptide-pulsed TGPMs, P25 and TB10Rg3 T cells continued to express CD69 and secreted IFN $\gamma$   
134 in a peptide dose-dependent manner (Fig 1i-l). These experiments show that P25 and TB10Rg3  
135 T cells can recognize their cognate antigens presented by TGPMs, both in short-term and long-  
136 term co-culture assays.

137

138

139 **Ag85b-specific CD4<sup>+</sup> T cells, but not TB10.4-specific CD8<sup>+</sup> T cells, restrict**  
140 **intracellular bacterial replication.**

141         Given that a primary function of T cells during Mtb infection is to restrict bacterial growth,  
142 we determined whether these T cell lines could limit intracellular mycobacterial growth *in vitro*.  
143 We infected TGPMs with H37Rv, a virulent Mtb strain that expresses both TB10.4 and Ag85b in  
144 vitro [21, 27]. To assess whether any bacterial growth inhibition observed was dependent on  
145 cognate recognition, we infected both MHC-matched (i.e., H-2<sup>b</sup>) and mismatched (i.e., H-2<sup>k</sup>)  
146 macrophages. T cells were added on day 1 post-infection, and the number of colony forming units  
147 (CFU) was assayed 96 hours later. In the absence of T cells, Mtb grew significantly ( $p < 0.01$ ) (Fig  
148 2). P25 T cells significantly inhibited intracellular bacterial growth in H37Rv-infected TGPMs  
149 ( $p < 0.0001$ ). Addition of Ag85b peptide to the infected macrophages did not further enhance the  
150 ability of P25 T cells to inhibit bacterial growth, suggesting that their activation was maximal. As  
151 expected, P25 T cells only inhibited bacterial growth in MHC-matched macrophages, indicating  
152 that growth inhibition mediated by T cells required cognate recognition under these conditions.

153         In contrast, TB10Rg3 T cells did not inhibit bacterial growth (Fig 2). We considered  
154 whether the inability of TB10Rg3 to inhibit bacterial growth was due to a lack of recognition of the  
155 infected macrophages or a defect in the T cells' effector functions. When Mtb-infected TGPMs  
156 were pulsed with the TB10.4<sub>4-11</sub> peptide for one hour prior to adding the T cells, TB10Rg3 T cells  
157 significantly reduced bacterial growth ( $p < 0.0001$ ) (Fig 2a). Thus, under the same conditions where  
158 P25 T cells significantly suppressed intracellular Mtb growth in a MHC-restricted manner,  
159 TB10Rg3 T cells failed to inhibit bacterial growth. Since TB10Rg3 T cells did inhibit bacterial  
160 growth when their cognate peptide was added to Mtb-infected macrophages, we conclude that  
161 TB10Rg3 T cells could express the effector function required to restrict intracellular bacterial  
162 growth; however, they simply did not recognize Mtb-infected macrophages.

163

164 **Ag85b-specific CD4<sup>+</sup> T cells, but not TB10.4-specific CD8<sup>+</sup> T cells, recognize Mtb-**  
165 **infected macrophages.**

166 To further investigate TB10Rg3 and P25 T cells recognition of Mtb-infected cells, we next  
167 investigated the kinetics of Mtb antigen presentation. After Mtb infection, TGPMs were cultured  
168 for various lengths of time before adding the T cells. To assay antigen presentation, we added  
169 the T cells for two hours and then measured Nur77 and CD69 (see Fig 1 for kinetics). When  
170 added immediately after infection (i.e., day 0), P25 T cells recognized Mtb-infected macrophages  
171 based on the induction of Nur77 and CD69 (Fig 3a, b). Under these conditions, there was no  
172 increase in Nur77 or CD69 expression by TB10Rg3 T cells (Fig 3c, d). We next chose later time  
173 points, which might allow Mtb to adapt to the intracellular environment and potentially let the  
174 TB10.4 antigen accumulate. TB10Rg3 T cells were added to infected macrophages on days 1, 3,  
175 or 5 post-infection. Again, we did not observe any increase in Nur77 or CD69 expression (Fig 3e,  
176 f). As a control for T cell health and function, we co-cultured TB10.4<sub>4-11</sub>-peptide-pulsed-,  
177 uninfected-macrophages with the TB10Rg3 T cells and observed significant increases in their  
178 Nur77 and CD69 expression (Fig 3).

179 Despite assessing recognition on multiple days, we considered whether the short assay  
180 period (i.e. 2 hours) might not detect recognition of Mtb-infected macrophages by TB10Rg3 T  
181 cells, especially if presentation of TB10.4 is inefficient or asynchronous. Therefore, we used IFN $\gamma$   
182 production as a cumulative indicator of T cell activation during a 72-hour co-culture experiment.  
183 Since cytokine-driven activation (e.g., IL-12, IL-18) can stimulate IFN $\gamma$  production by T cells  
184 independently of TCR signaling, we used MHC-matched (H-2<sup>b</sup>) or mismatched (H-2<sup>k</sup>) TGPM to  
185 assess cognate recognition [26, 28-30]. As the infectious dose (MOI, multiplicity of infection)  
186 increased, P25 T cells produced more IFN $\gamma$  when co-cultured with MHC-matched, but not MHC-  
187 mismatched, Mtb-infected TGPMs (Fig 3g). In contrast, TB10Rg3 T cells did not produce IFN $\gamma$   
188 when co-cultured with Mtb-infected TGPMs (Fig 3h). As before, TB10Rg3 T cells produced IFN $\gamma$



189 when co-cultured with uninfected macrophages pulsed with the TB10.4<sub>4-11</sub> peptide (Fig 3h). These  
190 data show that, regardless of the time point of T cell addition or the length of co-culture, P25 T  
191 cells, but not TB10Rg3 T cells, recognized Mtb-infected macrophages, based on their increased  
192 Nur77 and CD69 expression as well as their IFN $\gamma$  production.

193

#### 194 **TB10.4-specific CD8<sup>+</sup> T cells do not recognize lung cells from Mtb-infected mice.**

195 During *in vivo* infection, Mtb infects a variety of myeloid cells, and this diversity changes  
196 over the course of the infection [31-33]. We considered that lung myeloid cells from Mtb-infected  
197 mice are more physiologically relevant than TGPMs. Thus, we isolated MHC class II<sup>+</sup> lung cells  
198 from Erdman-infected, RAG-1-deficient mice 4 weeks post infection and tested their ability to  
199 present Mtb antigens to TB10Rg3 T cells. We used RAG-1-deficient mice because of the  
200 possibility that CD8<sup>+</sup> T cells in the lungs of Mtb-infected, wild type mice may recognize and  
201 eliminate any lung cells presenting the TB10.4 antigen. Since Mtb downregulates Ag85b  
202 expression by 3 weeks post infection [11, 12], we used an ESAT-6-specific CD4<sup>+</sup> T cell line we  
203 derived from C7 transgenic mice, which we refer to as C7 T cells [10, 34]. The immunodominant  
204 antigen ESAT-6 retains high levels of expression throughout infection and elicits a dominant CD4<sup>+</sup>  
205 T cell response in C57Bl/6 mice [11]. Due to the difficulty in obtaining large numbers of MHC class  
206 II<sup>+</sup> cells from uninfected, RAG-1-deficient mice, we used TGPMs from age-matched, RAG-1-  
207 deficient mice as a source of uninfected, inflammatory macrophages. We stained C7 or TB10Rg3  
208 T cells with 5 $\mu$ M of the proliferation dye eFluor450 (eBioscience) before co-culturing them with  
209 the lung myeloid cells. After 72 hours, we measured the T cell proliferation as a marker of T cell  
210 recognition. C7 T cells proliferated extensively when co-cultured with the infected lung myeloid  
211 cells but not when co-cultured with uninfected TGPMs (Fig 4a, b). In contrast, TB10Rg3 T cells  
212 did not proliferate when co-cultured with the lung myeloid cells (Fig 4c, d). To assess whether  
213 TB10Rg3 T cells could proliferate if TB10.4 was present, we pulsed the lung APCs with the  
214 TB10.4<sub>4-11</sub> peptide for 1 hour before adding the TB10Rg3 T cells. As predicted, TB10Rg3 T cells

215 proliferated after 72 hours of co-culture with peptide-pulsed, lung myeloid cells (Fig 4c, d).

216 We considered the possibility that Mtb in lung myeloid cells may not grow well in vitro,  
217 leading to altered antigen abundance that could affect T cell recognition. To address this  
218 possibility, we measured the bacterial burden in the lung myeloid cells. There was a 3-fold  
219 increase in the bacterial numbers between the beginning (d1) and the end (d4) of the experiment,  
220 indicating that the bacteria remained viable (Fig 4e). Together, these data indicate that, under the  
221 conditions in which C7 T cells recognized lung myeloid cells from Mtb-infected mice, TB10Rg3 T  
222 cells did not recognize these lung myeloid cells.

223

224 **TB10Rg3 CD8<sup>+</sup> and P25 CD4<sup>+</sup> T cells recognize macrophages infected with TB10.4-**  
225 **or Ag85b-expressing Listeria.**

226 We next investigated whether the location of the antigen might affect the presentation of  
227 TB10.4 since the MHC class I antigen presentation pathway primarily samples the cytosol,  
228 whereas Mtb is a classic phagosomal pathogen. TB10.4-specific CD8<sup>+</sup> T cells are primed and  
229 expanded during Mtb infection, so the TB10.4 antigens must be cross-presented; however,  
230 whether Mtb-infected macrophages are competent to cross-present mycobacterial antigens is  
231 unknown. We investigated these possibilities using  $\Delta$ LLO or  $\Delta$ ActA mutant strains of *Listeria*  
232 *monocytogenes* engineered to express the full length TB10.4 protein, hereafter referred to as  
233  $\Delta$ LLO.TB10.4 or  $\Delta$ ActA.TB10.4, respectively. Both are attenuated strains: the  $\Delta$ LLO.TB10.4  
234 mutant cannot escape from the vacuole, while the  $\Delta$ ActA.TB10.4 mutant can escape from the  
235 vacuole but not from the cell. Hence, the TB10.4 protein made by the  $\Delta$ LLO.TB10.4 strain will  
236 remain trapped in the phagosome, but the TB10.4 protein made by the  $\Delta$ ActA.TB10.4 strain will  
237 gain access to the cytosol.

238 TB10Rg3 T cells recognized  $\Delta$ ActA.TB10.4-infected TGPMs based on an increased  
239 frequency of Nur77-expressing cells ( $p < 0.005$ ) and the Nur77 MFI of all TB10Rg3 T cells

240 ( $p < 0.005$ ) (Fig 5a-c). Bafilomycin, which inhibits vacuolar acidification and impairs the entry of the  
241  $\Delta$ ActA.TB10.4 strain into the cytosol, diminished the frequency of Nur77-expressing cells  
242 ( $p < 0.005$ ) and Nur77 MFI ( $p < 0.01$ ) (Fig 5a, top, b, c). In contrast, TB10Rg3 T cells co-cultured  
243 with  $\Delta$ LLO.TB10.4-infected TGPMs showed no increase in the frequency of Nur77-expressing  
244 cells or the Nur77 MFI (Fig 5a bottom, d, e). If recombinant listeriolysin (rLLO), the protein missing  
245 from the  $\Delta$ LLO.TB10.4 strain, was added to the infected macrophages, an increase in the  
246 frequency of Nur77-expressing TB10Rg3 T cells ( $p < 0.01$ ) and the Nur77 MFI ( $p < 0.01$ ) became  
247 apparent. We also determined whether P25 T cells recognized Ag85b-expressing *Listeria*  
248 *monocytogenes* using the recombinant *Listeria* strains  $\Delta$ ActA.Ag85b and  $\Delta$ LLO.Ag85b. Based on  
249 the propensity of MHC class II to present extracellular and vacuolar antigens, P25 cells  
250 recognized TGPMs infected with either  $\Delta$ ActA.Ag85b or  $\Delta$ LLO.Ag85b, based on an increase in  
251 the frequency of Nur77-expressing T cells and Nur77 MFI ( $p < 0.005$ ) (Fig 5g, h). These results  
252 show that 1) TGPMs can efficiently process the full length TB10.4 protein and present the  
253 TB10.4<sub>4-11</sub> epitope via MHC class I; 2) this process is more efficient when the bacteria is in the  
254 cytosol; and 3) TB10Rg3 T cells can efficiently recognize TB10.4<sub>4-11</sub> presented during a live  
255 infection.

256

### 257 **TB10.4-specific CD8<sup>+</sup> T cells do not recognize Mtb overexpressing TB10.4.**

258 We considered several additional possibilities as to why the TB10Rg3 T cells did not  
259 recognize Mtb-infected macrophages. Antigen abundance can affect T cell recognition, so we  
260 next tested whether increasing the level of TB10.4 protein expression might enhance TB10Rg3 T  
261 cell recognition of Mtb-infected macrophages. Since Mtb secretes esxH (TB10.4) together with  
262 esxG as a heterodimer [35], we developed a recombinant strain of H37Rv (esxGH-OE.Mtb), which  
263 overexpresses both esxG and esxH under the control of a tet<sup>ON</sup> promoter. After tetracycline  
264 induction for 24 hours, the esxG and esxH mRNA expression increased multiple folds (Fig 6a).

265 Prior to in vitro infection, we treated esxGH-OE.Mtb with or without tetracycline. The next day,  
266 TGPMs were infected with induced or uninduced esxGH-OE.Mtb. P25 T cells produced similar  
267 amounts of IFN $\gamma$  when co-cultured with macrophages infected with either uninduced or induced  
268 esxGH-OE.Mtb, which was expected since Ag85b expression should not be altered (Fig 6b).  
269 Despite increasing the production of TB10.4 by Mtb, TB10Rg3 T cells still did not recognize Mtb-  
270 infected macrophages (Fig 6c). Although we cannot be certain that the induction of EsxGH leads  
271 to an increased amount of antigen delivered to the antigen processing pathway, this result  
272 suggests that antigen abundance is not limiting TB10.4-specific CD8<sup>+</sup> T cell recognition of Mtb-  
273 infected macrophages.

274

275 **Mtb infection does not significantly impair MHC class I and II expression by**  
276 **macrophages.**

277 We also investigated whether Mtb may inhibit MHC class I expression by infected TGPMs.  
278 Mtb and TLR2 agonists inhibit IFN $\gamma$ -induced MHC class II expression by bone marrow derived  
279 macrophages, and the mycobacterial PPE38 protein can inhibit MHC class I expression in  
280 RAW264.7 macrophages and TGPMs infected with *Mycobacterium smegmatis* [36, 37].  
281 Therefore, we asked whether Mtb impaired MHC class I expression in our in vitro infection system,  
282 especially since the TGPMs were not pre-activated with IFN $\gamma$  prior to infection. We measured  
283 MHC class I and II expression by macrophages on each of the five days following infection. At  
284 baseline, uninfected TGPMs expressed high MHC class I, and Mtb infection did not alter MHC  
285 class I expression compared to the baseline (Fig 6d, e; solid lines). Although IFN $\gamma$  pretreatment  
286 of macrophages led to an increase in MHC class I expression in uninfected TGPMs, infected  
287 TGPMs did not achieve the same peak levels (Fig 6d, e; dotted lines). As expected, the regulation  
288 of MHC class II was more sensitive to IFN $\gamma$ . Uninfected TGPMs expressed low baseline levels of  
289 MHC class II (Fig 6f, g; solid lines). IFN $\gamma$  pretreatment resulted in a >100-fold increase in MHC

290 class II median fluorescence intensity (MFI) in the uninfected TGPMs, which peaked on day 3  
291 with a >2000-fold increase over the baseline (Fig 6f, g; dotted lines). Mtb-infection alone did not  
292 significantly affect MHC class II expression, and consistent with previous studies, Mtb significantly  
293 impaired the induction of MHC class II by IFN $\gamma$  pretreatment (Fig 6f, g). These data show that in  
294 our in vitro infection model, in which the TGPMs were unstimulated, Mtb infection did not inhibit  
295 class I and II MHC expression. Importantly, the differences in MHC class I or class II expression  
296 by Mtb-infected macrophages cannot explain why P25 T cells, but not TB10Rg3 T cells,  
297 recognized infected macrophages.

298

299 **Macrophages cross-present antigens from non-viable Mtb to TB10.4-specific CD8<sup>+</sup>**  
300 **T cells.**

301 Next, we hypothesized that Mtb may interfere with MHC class I presentation of  
302 mycobacterial antigens. Therefore, we tested the ability of the P25 and TB10Rg3 T cell lines to  
303 recognize TGPMs cultured with  $\gamma$ -irradiated, nonviable Mtb. Activation of pattern recognition  
304 receptors such as TLR2 and TLR4 by large amounts of dead bacteria might induce large amounts  
305 of IL-12 and IL-18, resulting in cytokine-driven T cell activation. Taking this concern into  
306 consideration, we used MHC-mismatched TGPMs as a control. We pulsed macrophages with a  
307 dose titration of  $\gamma$ -irradiated Mtb, then added TB10Rg3 or P25 T cells, and measured IFN $\gamma$   
308 secretion by the T cells after 72 hours. Both P25 and TB10Rg3 T cells produced high amounts of  
309 IFN $\gamma$  when cultured with MHC-matched (i.e., H-2<sup>b</sup>) but not with MHC-mismatched (i.e., H-2<sup>k</sup>),  
310 TGPMs, and this response was dose dependent (Fig 6h, i). The ability of macrophages to process  
311 and present TB10.4 after phagocytosing  $\gamma$ -irradiated Mtb but not viable bacteria raises the  
312 possibility that live Mtb actively inhibit MHC class I presentation of TB10.4.

313

314 **Polyclonal, TB10.4<sub>4-11</sub>-tetramer negative CD8<sup>+</sup> T cells from the lungs of Mtb-infected**  
315 **mice recognize infected macrophages.**

316 Along with the previous finding that TB10.4<sub>4-11</sub>-specific CD8<sup>+</sup> T cells make up ~40% of total  
317 lung CD8<sup>+</sup> T cells during infection (S1 Figure) [19], our finding that TB10Rg3 T cells do not  
318 recognize Mtb-infected macrophages suggests that TB10.4 may be a decoy antigen. This raises  
319 the question whether the inability to recognize Mtb-infected macrophages is a general feature of  
320 the CD8<sup>+</sup> T cell response to Mtb, or if this is a unique feature of TB10.4-specific CD8<sup>+</sup> T cells.  
321 Therefore, we determined whether polyclonal CD8<sup>+</sup> T cells from the lungs of infected mice could  
322 recognize Mtb-infected macrophages. We carried out aerosol infection of C57BL/6 mice with  
323 Erdman, and, 6-8 weeks post infection, we purified polyclonal CD4<sup>+</sup> or CD8<sup>+</sup> T cells from their  
324 lungs and co-cultured them with Mtb-infected macrophages. After 72 hours of co-culture,  
325 polyclonal CD4<sup>+</sup> T cells produced high amounts of IFN $\gamma$  in a MHC-restricted manner (Fig 7a).  
326 Interestingly, polyclonal CD8<sup>+</sup> T cells also produced IFN $\gamma$  in a MHC-restricted manner when co-  
327 cultured with Mtb-infected macrophages (Fig 7b). These results indicate that other antigen-  
328 specific CD8<sup>+</sup> T cells recognizing Mtb-infected macrophages do exist, and infected TGPMs can  
329 present Mtb antigens to CD8<sup>+</sup> T cells. However, based on the high abundance of TB10.4-specific  
330 CD8<sup>+</sup> T cells post infection (S1 Figure), the non-TB10.4-specific, Mtb-specific CD8<sup>+</sup> T cells may  
331 be dwarfed by the dominant TB10.4-specific CD8<sup>+</sup> T cells.

332 To better assess whether the IFN $\gamma$  production by polyclonal CD8<sup>+</sup> T cells arose  
333 predominantly from non-TB10.4-specific CD8<sup>+</sup> T cells, we used the TB10.4<sub>4-11</sub>-tetramer to  
334 separate TB10.4-specific and non-TB10.4-specific, polyclonal CD8<sup>+</sup> T cells from the lungs of  
335 infected mice. After 72-hour co-culture with Mtb-infected macrophages, TB10.4<sub>4-11</sub>-tetramer  
336 negative CD8<sup>+</sup> (non-TB10.4-specific CD8<sup>+</sup>) T cells produced significantly higher IFN $\gamma$  compared  
337 to that of uninfected control ( $p < 0.005$ ), and the production was MHC class I restricted (Fig 7c). In  
338 contrast, TB10.4<sub>4-11</sub>-specific CD8<sup>+</sup> T cells produced IFN $\gamma$  in a non-MHC-restricted manner during

339 co-culture with both uninfected and Mtb-infected macrophages (Fig 7d). We cannot exclude the  
340 possibility that the tetramer isolation might have inadvertently activated the TB10.4<sub>4-11</sub>-specific  
341 CD8<sup>+</sup> T cells. Nevertheless, these data show that polyclonal, TB10.4<sub>4-11</sub>-tetramer negative CD8<sup>+</sup>  
342 T cells recognized Mtb-infected macrophages, supporting the notion of a subdominant T cell  
343 response that may be effective at detecting Mtb.

## 344 **Discussion**

345           A complexity in defining T cell recognition is distinguishing cognate from non-cognate  
346 recognition. T cell IFN $\gamma$  production, a common readout for recognition, can be stimulated by IL-  
347 12 and IL-18, two cytokines secreted by Mtb-infected cells [26, 28-30]. Even cognate recognition  
348 does not always signify recognition of infected cells. Uninfected macrophages and dendritic cells  
349 (DCs) can acquire exosomes, soluble proteins, apoptotic vesicles or necrotic debris containing  
350 non-viable bacilli or its antigens, and present these to T cells [13, 38-40]. This detour pathway  
351 allows T cells to be activated by uninfected DCs [38, 41]. Thus, T cell recognition of infected  
352 macrophages, which is central to our fundamental paradigm of TB pathogenesis, remains poorly  
353 defined.

354           Our study advances the understanding of T cell recognition of Mtb-infected cells. By  
355 focusing on TCR-mediated recognition, our data show that T cells specific to immunodominant  
356 antigens vary in their ability to recognize Mtb-infected macrophages. Despite being a persistent  
357 and dominant population of CD8<sup>+</sup> T cells in the lungs of Mtb-infected mice, TB10.4<sub>4-11</sub>-specific  
358 CD8<sup>+</sup> T cells do not recognize Mtb-infected macrophages. While we primarily used TGPMs, which  
359 have been used to model human macrophages [42, 43], we also showed that TB10.4-specific  
360 CD8<sup>+</sup> T cells also failed to recognize lung APCs from infected mice. Importantly, concurrent with  
361 our analysis of CD8<sup>+</sup> T cells, we systematically assessed recognition of Mtb-infected  
362 macrophages by Ag85b-specific (i.e., P25) and ESAT-6-specific (i.e., C7) CD4<sup>+</sup> T cells. Both  
363 recognized Mtb-infected macrophages and inhibited bacterial growth (here and [10]). Thus, under  
364 conditions that activated Mtb-specific CD4<sup>+</sup> T cells, no activation of TB10.4-specific CD8<sup>+</sup> T cells  
365 occurred. This finding has many implications, among which the most important is that not all Mtb-  
366 specific T cells recognize Mtb-infected macrophages.

367           These results led us to re-examine the evidence that CD8<sup>+</sup> T cells recognize infected cells.  
368 In our evaluation of the literature, among the best evidence is: (1) direct ex vivo recognition of



369 Mtb-infected macrophages and DC by CD4<sup>+</sup> and CD8<sup>+</sup> T cells [44-47]; (2) murine T cells' cytolytic  
370 activity (CTL) of MTb-infected cells [48-50]; (3) human CD8<sup>+</sup> T cells that recognize Mtb-infected  
371 DC [51-53]. However, these data have limitations. The murine studies never demonstrated  
372 cognate recognition, and the frequencies were lower than expected. The human studies were  
373 only done using DC and not macrophages and used a high MOI, raising concerns about death of  
374 infected cells and presentation of nonviable antigen. Nevertheless, these studies are consistent  
375 with the idea that CD8<sup>+</sup> T cells recognize infected cells, but the frequency that recognize infected  
376 macrophages might be lower than we previously expected. Such a finding might explain why  
377 CD8<sup>+</sup> T cells make a disproportionately small contribution to host defense, even though Mtb  
378 infection elicits a robust CD8 T cell response.

379 We investigated several mechanisms that might explain why TB10.4-specific CD8<sup>+</sup> T cells  
380 do not recognize infected macrophages. One possibility is the access of the TB10.4 antigen to  
381 the MHC class I processing pathway. Mtb can disrupt the phagosomal membrane and translocate  
382 into the cytosol [54], though this action often occurs later in infection and leads to necrosis of the  
383 macrophage [55]. We saw no evidence of recognition even at late time points such as days 4-5  
384 post infection (Fig 3), when phagosomal disruption and bacterial translocation occurs [55]. The  
385 importance of antigen location became apparent during the *Listeria* infection experiments, where  
386 infected macrophages presented TB10.4<sub>4-11</sub> only when the bacteria could enter the cytosol (i.e.,  
387  $\Delta$ ActA.TB10 but not  $\Delta$ LLO.TB10). The *Listeria* experiments also provided an additional insight.  
388 Lindenstrom et al report that vaccination with TB10.4 (EsxH), which has a leucine at position 12  
389 (i.e., IMYNYPAML), inefficiently generates TB10.4-specific CD8<sup>+</sup> T cells [56]. However,  
390 vaccination with TB10.3 (EsxR), a related antigen that also contains the same epitope followed  
391 by a methionine (i.e., IMYNYPAMM), elicits TB10.4-specific CD8<sup>+</sup> T cells. This led them to  
392 conclude there is a processing defect that prevents the generation of the TB10.4<sub>4-11</sub> epitope from  
393 the TB10.4 protein. However, they also find that TB10.4-specific CD8<sup>+</sup> T cells elicited by TB10.3  
394 vaccination recognize splenocytes pulsed with the rTB10.4 proteins, showing that the full length

395 TB10.4 protein can be processed and presented. These data indicate that the lack of vaccine-  
396 elicited TB10.4-specific CD8<sup>+</sup> T cells is due to a problem with priming after vaccination instead of  
397 an inability to process the IMYNYPAM epitope. Moreover, our data using TB10.4 expressed by  
398 *Listeria* show that TGPMS can process the full length TB10.4 protein and present the TB10.4<sub>4-11</sub>  
399 epitope. Therefore, we conclude that the processing of TB10.4 is not hindered by its amino acid  
400 sequence, and antigen location may be an important factor in antigen presentation. While the  
401 *Listeria* experiments show the potential importance of antigen location and raise the possibility  
402 that sequestration of the TB10.4 antigen in the phagosome renders it inaccessible to the MHC  
403 class I presentation pathway, another important variable is antigen abundance.

404 We have previously argued that there is limited amount of TB10.4 antigen presentation in  
405 the lungs of infected mice, leading to extreme bias in the TCR repertoire of the TB10.4-specific  
406 CD8<sup>+</sup> T cell response and defects in the memory-recall response in vivo [19, 23]. We considered  
407 whether low TB10.4 abundance could explain why *Mtb*-infected macrophages do not present  
408 TB10.4. To test this possibility, we overexpressed EsxG and EsxH (TB10.4) together but did not  
409 see greater T cell recognition of *Mtb*-infected macrophages, suggesting that abundance might not  
410 be the issue.

411 Unexpectedly, macrophages pulsed with  $\gamma$ -irradiated *Mtb* were recognized by TB10.4-  
412 specific CD8<sup>+</sup> T cells, raising the possibility that live *Mtb* actively inhibits MHC class I presentation  
413 of TB10.4. This is particularly interesting since the presentation of CFP10, another ESAT-6-like  
414 protein, by human DCs to CD8<sup>+</sup> T cells requires viable *Mtb*; DCs given heat-killed bacteria do not  
415 present CFP10 to T cells [53]. While these data suggest that presentation requires active  
416 secretion of CFP10 [57, 58], the heat-killing process could have destroyed CFP10, or there might  
417 not have been sufficient amounts of CFP10 available in the non-viable bacteria. In combination  
418 with our data showing polyclonal CD8<sup>+</sup> T cells recognize *Mtb* infected macrophages, these data  
419 show that it is possible that certain antigens are presented by live *Mtb* while others are actively  
420 prevented from being sampled by MHC class I.

421 Ag85b is an immunodominant antigen with an epitope recognized by CD4<sup>+</sup> T cells in  
422 C57BL/6 mice. In vivo data shows that Ag85b-specific CD4<sup>+</sup> T cells can recognize Mtb-infected  
423 cells early during infection; however, recognition decreases after infection is established [12, 14,  
424 15, 59, 60]. The inability of Ag85b-specific CD4<sup>+</sup> T cells to efficiently recognize Mtb-infected bone-  
425 marrow derived macrophages (BMDMs) or bone-marrow derived dendritic cells (BMDCs) stems  
426 from a combination of reduced Ag85b expression by Mtb and because infected cells actively  
427 export Ag85b into the extracellular milieu [12, 13]. In our experiments, we found that P25 T cells  
428 recognized Mtb-infected macrophages and inhibited bacterial growth in a MHC-restricted manner.  
429 A difference between the studies is the duration of macrophage and T cell co-culture. Grace et al  
430 examined 16-24 hours and found a lack of recognition, whereas our assays focused on 72-96  
431 hours and detected recognition. Moreover, it is unknown whether Mtb-infected cells still exported  
432 antigens after the initial 24 hours of infection. Furthermore, the exported Ag85b could be taken  
433 up by infected cells during longer co-cultures, leading to their recognition by T cells. Finally, it is  
434 possible that cognate recognition of uninfected cells that present Ag85b could activate CD4<sup>+</sup> T  
435 cells in a TCR-mediated manner, inducing IFN $\gamma$  and indirectly controlling Mtb replication in  
436 macrophages. Nonetheless, under conditions that activate Mtb-specific CD4<sup>+</sup> T cells, we could  
437 not observe activation of TB10.4-specific CD8<sup>+</sup> T cells.

438 The TB10.4<sub>4-11</sub> epitope has been extensively used to characterize CD8<sup>+</sup> T cell responses  
439 in the mouse model of TB, and TB10.4-specific CD8<sup>+</sup> T cell responses have also been  
440 characterized in people with tuberculosis [19, 21, 23, 56, 61-63]. The finding that TB10.4-specific  
441 CD8<sup>+</sup> T cells do not recognize infected macrophages was unexpected, particularly since TB10.4-  
442 specific CD8<sup>+</sup> T cells persist in the lungs of infected mice and become more dominant with time  
443 [18, 19]. From these experiments, two questions warrant further investigation: 1) whether the  
444 CD8<sup>+</sup> T cells specific to other epitopes of TB10.4 also inefficiently recognize infected  
445 macrophages, and 2) whether the species or the host genetic background influence recognition  
446 of infected cells.

447           In retrospect, our findings may partially explain why eliciting TB10.4-specific CD8<sup>+</sup> T cells  
448 by vaccination fails to protect mice against Mtb infection [23, 56]. While vaccination with  
449 immunodominant antigens recognized by CD4<sup>+</sup> T cells (e.g., Ag85b, ESAT-6) induce moderate  
450 protection [64, 65], we must consider the possibility that these antigens may not be the best  
451 stimulators of protective immunity. Ag85b-specific CD4<sup>+</sup> T cells have variable efficacy, in large  
452 part due to its reduced expression by the bacterium as early as 3 weeks after infection [11, 12].  
453 However, by their nature, the recruitment of memory T cell responses specific for  
454 immunodominant antigens is only incrementally faster than the primary T cell response [10, 23].  
455 Thus, a crucial question for vaccine development is whether other Mtb antigens resemble TB10.4,  
456 in that they elicit T cell responses that fail to recognize infected macrophages. We did detect  
457 polyclonal CD8<sup>+</sup> T cells that recognized Mtb infected macrophages, corroborating a previous  
458 study showing that polyclonal CD8<sup>+</sup> T cells from infected mice can lyse Mtb-infected cells [48].  
459 These data indicate that there are antigens presented by Mtb-infected cells, even if those antigens  
460 may be subdominant compared to TB10.4. Thus, future vaccine developments will benefit by  
461 identifying antigen targets based on their ability of being presented rather than only their  
462 immunogenicity.

463           Priming of TB10.4-specific CD8<sup>+</sup> T cells occurs early after Mtb infection in the lung draining  
464 lymph node (LN) [23, 66]. Yet it is unknown whether priming of naïve T cells occurs via Mtb-  
465 infected DCs, or uninfected DCs that acquire antigen through uptake of apoptotic blebs containing  
466 Mtb proteins [38, 41], or by the transfer of antigen from cell to cell [40]. Being primed by an  
467 uninfected cell can have detrimental consequences if the infected cell presents a different  
468 repertoire of Mtb antigens. Considering our findings, we propose that TB10.4 is a decoy antigen:  
469 TB10.4-specific CD8<sup>+</sup> T cells expand in the LN during priming, accumulate in the lungs, but  
470 ineffectively recognize Mtb-infected macrophages. This raises the hypothesis that not all immune  
471 responses elicited by Mtb provide benefits to the host. Interestingly, Mtb genes encoding epitopes  
472 recognized by T cells are more highly conserved than other DNA elements, implying that T cell

473 recognition of these Mtb epitopes may provide a survival advantage to the bacterium [67, 68]. For  
474 example, T cell dependent inflammation may benefit Mtb by promoting transmission. Even though  
475 TB10.4 is more variable than most other antigens, our results support these genetic data [67, 68].  
476 Thus, Mtb focuses the CD8<sup>+</sup> T cell response on the decoy antigen TB10.4 and distracts the  
477 immune response from other antigens that might be targets of protective immunity, successfully  
478 evading T cell immunity and enabling it to establish itself as persistent infection.

## 479 **Materials and Methods**

480

### 481 **Ethics Statement**

482           Studies involving animals were conducted following relevant guidelines and regulations,  
483 and the studies were approved by the Institutional Animal Care and Use Committee at the  
484 University of Massachusetts Medical School (Animal Welfare A3306-01), using the  
485 recommendations from the Guide for the Care and Use of Laboratory Animals of the National  
486 Institutes of Health and the Office of Laboratory Animal Welfare.

### 487 **Mice**

488           C57BL/6J, Rag-1-deficient (B6.129S7-Rag1<sup>tm1Mom</sup>), B10 (C57BL/10J), B10.BR (B10.BR-  
489 H2<sup>k2</sup> H2-T18<sup>a</sup>/SgSnJJrep), P25 (C57BL/6-Tg(H-2K<sup>b</sup>-Tcr $\alpha$ ,Tcr $\beta$ )P25Ktk/J) [24, 69], mice were  
490 obtained from Jackson Laboratories (Bar Harbor, ME). C57BL/6J and B10 mice were used for  
491 isolating MHC-matched TGPMs while B10.BR mice were used for isolating MHC-mismatched  
492 TGPMs. C57BL/6 K<sup>b/-</sup>D<sup>b/-</sup> (MHC I<sup>-/-</sup>) mice were a generous gift from Dr. Kenneth Rock (University  
493 of Massachusetts Medical School, MA). C7 TCR transgenic mice were a generous gift from Dr.  
494 Eric Pamer (Memorial Sloan Kettering Cancer Center, NY)[34].

### 495 **Thioglycolate-elicited peritoneal macrophages**

496           Thioglycolate-elicited peritoneal macrophages were obtained 4-5 days after intra-  
497 peritoneal injection of mice with 3% thioglycolate solution, as described [28].  $1 \times 10^5$  macrophages  
498 were plated per well. Macrophages were maintained in culture with RPMI 1640 media (Invitrogen  
499 Life Technologies, ThermoFisher, Waltham, MA) supplemented with 10 mM HEPES, 1 mM  
500 sodium pyruvate, 2 mM L-glutamine (all from Invitrogen Life Technologies) and 10% heat-  
501 inactivated fetal bovine serum (HyClone, GE Healthcare Life Sciences, Pittsburgh, PA), referred  
502 hereafter as supplemented complete media.

### 503 **Generation of CD8<sup>+</sup> and CD4<sup>+</sup> T cell lines**

504           Retrogenic mice expressing TB10Rg3 TCR specific for the TB10.4<sub>4-11</sub> epitope were

505 generated as previously described [19]. The TB10Rg3 CD8<sup>+</sup> T cells were isolated from these  
506 mice, stimulated *in vitro* with irradiated splenocytes pulsed with the peptide TB10.4<sub>4-11</sub> in complete  
507 media containing IL-2. P25 or C7 CD4<sup>+</sup> T cells were isolated from transgenic P25 or C7 mice,  
508 respectively [24, 34]. The P25 and C7 cells were stimulated *in vitro* with irradiated splenocytes  
509 pulsed with the Ag85b<sub>241-256</sub> peptide or the ESAT-6<sub>1-15</sub>, respectively, in complete media containing  
510 IL-2 and anti-IL-4. After the initial stimulation, these T cells were split every two days for 3-4  
511 divisions and rested for two to three weeks. After the initial stimulation, the cells were cultured in  
512 complete media containing IL-2 and IL-7.

### 513 **Peptides**

514 The following synthetic peptide epitopes were used as antigens: TB10.4<sub>4-11</sub>  
515 (IMYNYPAM); Ag85b<sub>241-256</sub> (QDAYNAAGGHNAVFN); and ESAT-6<sub>1-15</sub> (MTEQQWNFAGIEAAA).  
516 We also generated a negative control peptide predicted to not bind to H-2 K<sup>b</sup>: IMANAPAM. The  
517 peptides were obtained from New England Peptides (Gardner, MA).

518 As positive controls assessing the function of macrophages to present antigen, uninfected  
519 macrophages and, in certain experiments, infected macrophages were pulsed with the peptides  
520 of interest. We pulsed macrophages by incubating 10uM of the peptides of interest with the  
521 macrophages in supplemented complete RPMI 1640 media for 1 hour. After incubation, the cells  
522 were washed 3 to 5 times with fresh supplemented complete RPMI 1640 media. The cells were  
523 then resuspended in supplemented complete RPMI 1640 media for experiments.

### 524 ***In vitro* Mtb infection**

525 H37Rv was grown as previously described [28]. Bacteria was grown to an OD<sub>600</sub> of 0.6 –  
526 1.0, washed in RPMI, opsonized with TB coat (RPMI 1640, 1% heat-inactivated FBS, 2% human  
527 serum, 0.05% Tween-80), washed again and filtered through a 5 micron filter to remove bacterial  
528 clumps. The bacteria were counted using a Petroff-Hausser chamber. Infection was performed  
529 as previously described [28]. The final multiplicity of infection (MOI), based on plating CFU, was

530 0.2-0.8 for all experiments. For CFU-based, bacterial growth inhibition assays, T cells were added  
531 at a ratio of 5 T cells to each macrophage. Four replicate wells were used for each condition. Cell  
532 cultures were lysed by adding 1/10<sup>th</sup> volume of with 10% Triton X-100 in PBS (final concentration  
533 of 1%), and CFUs were determined by plating in serial dilutions of the lysates on Middlebrook  
534 7H10 plates. CFUs were enumerated after culture for 21 days at 37°C and 5% CO<sub>2</sub>.

### 535 ***In vivo* aerosol Mtb infection and lung cell isolation**

536 Aerosol infection of mice was done with the Erdman strain of Mtb using a Glas-Col aerosol-  
537 generation device. A bacterial aliquot was thawed, sonicated for 1 minute and then diluted in 0.9%  
538 NaCl-0.02% Tween-80 to 5 ml. The number of Mtb deposited in the lungs was determined for  
539 each experiment, by plating undiluted lung homogenate from a subset of the infected mice within  
540 24 hours of infection. The inoculum varied between 37-120 CFU. For the ex vivo APC  
541 experiments, lung cells were isolated from Erdman-infected, RAG-1-deficient mice, 4-weeks post-  
542 infection, and the APCs were enriched by positive selection using anti-MHC class II<sup>+</sup> microbeads  
543 (Miltenyi Biotec, Bergisch Gladbach, Germany) and the Miltenyi AutoMACS. On average, the  
544 isolated cells were 89% CD11c<sup>+</sup> or CD11c<sup>+</sup>CD11b<sup>+</sup>. The APCs were counted on a hemocytometer  
545 and plated at 1x10<sup>5</sup> per well in supplemented complete RPMI 1640 media.

546 For the ex vivo CD4<sup>+</sup> and CD8<sup>+</sup> T cell experiments, single cell suspensions were isolated  
547 from the lungs of infected C57BL/6 mice, 6 to 8 weeks post-infection, as described [10]. Polyclonal  
548 CD4<sup>+</sup> and CD8<sup>+</sup> T cells were enriched by positive selection using Mouse CD4<sup>+</sup> and Mouse CD8<sup>+</sup>  
549 T cell isolation kits, respectively (Miltenyi Biotec). After enrichment, average purity for polyclonal  
550 CD4<sup>+</sup> and CD8<sup>+</sup> T cells were 93% and 95%, respectively. For experiments investigating TB10.4-  
551 <sub>11</sub>-tetramer positive cells and polyclonal, non-TB10.4-specific, CD8<sup>+</sup> T cells, the following isolation  
552 was done. Single cell suspensions from the lungs of infected mice were incubated with APC-  
553 conjugated, TB10.4-<sub>4-11</sub>-loaded, H-2<sup>b</sup> tetramers from the National Institute of Health Tetramer  
554 Core Facility (Emory University Vaccine Center, Atlanta, GA). Tetramer positive CD8<sup>+</sup> T cells were  
555 then selected via the AutoMACS separator by anti-APC microbeads (Miltenyi Biotec). Average



556 purity of TB10.4<sub>4-11</sub>-tetramer positive, CD8<sup>+</sup> T cells was 85%, with 1.4% contaminating CD4<sup>+</sup> T  
557 cells. The tetramer negative population was subsequently washed and then enriched for  
558 polyclonal CD8<sup>+</sup> T cells via Mouse CD8<sup>+</sup> T cell isolation kit (Miltenyi Biotec). Average purity of  
559 polyclonal, non-TB10.4<sub>4-11</sub>-tetramer positive, CD8<sup>+</sup> T cells was 75% with 0.8% contaminating  
560 CD4<sup>+</sup> T cells and 13% contaminating TB10.4<sub>4-11</sub>-tetramer positive CD8<sup>+</sup> T cells. The T cells were  
561 counted using a hemocytometer and resuspended in supplemented complete RPMI 1640 media  
562 before being used in experiments.

### 563 **Listeria infections**

564 The recombinant Listeria strains have been previously described [23]. For in vitro  
565 infections, they were grown to an OD<sub>600</sub> of 0.6-1.0 in BHI media (Sigma Aldrich) with 10 ug/ml  
566 chloramphenicol (Sigma Aldrich) at 30°C. Macrophages were infected with the Listeria strains  
567 using a MOI 50, for 45 minutes. Extracellular bacteria were eliminated by adding 60 ug/ml  
568 gentamicin (Sigma Aldrich) for 20 minutes. Bacterial burden was assessed by lysing the infected  
569 macrophages with 1% TritonX-100 in PBS, and plating serial dilutions of the lysate on BHI  
570 agarose supplemented with 10ug/ml chloramphenicol (Sigma Aldrich, St. Louis, MO).  
571 Recombinant listeriolysin (Prospec, East Brunswick, NJ) was added in some experiments at 2  
572 ug/ml for 30 minutes, and any excess was washed away. Bafilomycin (InvivoGen, San Diego, CA)  
573 was added in some experiments at 5 uM for 30 minute, before being washed away.

### 574 **Generation of TB10.4-overexpressing Mtb strains**

575 pJR1103 was cleaved with EcoRI-HF and Sall-HF [70]. mCherry preceded by the groEL2  
576 promoter from H37Rv was inserted by HiFi Assembly. The resulting plasmid was cleaved with  
577 NdeI and NotI-HF. The esxGH gene from H37Rv, along with 12 upstream nucleotides, was  
578 inserted by HiFi Assembly following the plasmid-borne tetracycline-inducible promoter. All  
579 enzymes used above were purchased from New England Biolabs. The resulting plasmid (pGB6)  
580 was electroporated into Mtb H37Rv and integrated at the L5 site. RNA was purified from induced

581 and uninduced cultures using TRIzol (ThermoFisher) and chloroform extraction, followed by  
582 purification on Zymo columns. cDNA was produced with Superscript IV (ThermoFisher), and  
583 quantitative PCR was performed using the iTaq SYBR Green Supermix (Bio-Rad, Hercules, CA)  
584 on an Applied Biosystems Viia 7 thermocycler.

### 585 **Irradiated H37Rv**

586 The following reagent was obtained through BEI Resources, NIAID, NIH: *Mycobacterium*  
587 *tuberculosis*, Strain H37Rv, Gamma-Irradiated Whole Cells, NR-14819. The irradiated H37Rv  
588 was gently sonicated using a cup-horn sonicator at a low power to disperse bacterial clumps while  
589 limiting bacterial lysis. The number of bacteria were approximated by measuring the turbidity at  
590 OD<sub>600</sub>, and correlating it with live H37Rv (OD<sub>600</sub> = 1 is equivalent to 3.0x10<sup>8</sup> CFU/ml). To pulse  
591 TGPMS, diluted, sonicated,  $\gamma$ -irradiated H37Rv were added to adherent macrophages for one  
592 hour before repeatedly washing the cultures to remove residual extracellular bacteria.  
593 Subsequently, TB10Rg3 or P25 T cells were added at a ratio of 1 T cell to 1 macrophages. After  
594 72 hours, the amount of IFN $\gamma$  in the supernatants was measured using Mouse IFN $\gamma$  ELISA MAX  
595 kits (Biolegend, San Diego, CA).

### 596 **Flow Cytometry Analysis**

597 The following cell surface antigens were detected by flow cytometry using the following  
598 antibodies: mouse CD4 (clone GK1.5), CD8 (clone 53-6.7), CD3 $\epsilon$  (clone 145-2C11), CD69 (clone  
599 H1.2F3), I-A/I-E (clone M5/114.15.2), and H-2K<sup>b</sup> (clone AF6-88.5) (all from Biolegend). BV421-  
600 and APC-conjugated, TB10.4<sub>4-11</sub>-loaded, H-2K<sup>b</sup> tetramers were obtained from the National  
601 Institutes of Health Tetramer Core Facility (Emory University Vaccine Center, Atlanta, GA).  
602 Zombie Violet Fixable viability dye (Biolegend) or the Live/Dead Fixable Far Red Dead Cell stain  
603 (ThermoFisher) were used for distinguishing live from dead cells. To stain for the Nur77  
604 transcription factor, the Nur77 monoclonal antibody (clone 12.14) was used in combination with  
605 the Foxp3 Transcription Factor Staining Buffer Set (both from ThermoFisher) by the

606 manufacturer's protocol. Live/dead viability staining and surface staining were done for 20  
607 minutes at 4°C, and intracellular staining was done for 30 minutes at room temperature. Samples  
608 were then fixed with 1% paraformaldehyde/PBS for 1 hour before being analyzed by a  
609 MACSQuant flow cytometer (Miltenyi Biotec). FlowJo Software (Tree Star, Portland, OR) was  
610 used to analyze the collected data. Single lymphocytes were gated by forward scatter versus  
611 height and side scatter for size and granularity, and dead cells were excluded.

## 612 **Normalization and statistical analysis**

613 To compare the cellular expression of Nur77 and CD69 expression levels between time  
614 points, the MFI values were normalized as follows: experimental values were divided by the  
615 difference between the isotype control MFI (minimum response) and the peptide control MFI  
616 (maximum response).

617 Each figure represents a minimum of 2 similar experiments, with 2 to 4 biological replicates  
618 in each experiment. Data are represented as mean  $\pm$  standard error of the mean (SEM). For  
619 comparing two groups, a two-tailed, unpaired student's t-test was used. For more than two  
620 groups, the data were analyzed using a one-way ANOVA. A p value  $< 0.05$  was considered to be  
621 statistically significant. Analysis was performed using GraphPad Prism, Ver. 7 (GraphPad  
622 Software, La Jolla, CA).

623 **Figure Legends:**

624 **Figure 1. TB10.4-specific CD8<sup>+</sup> (TB10Rg3) and Ag85b-specific CD4<sup>+</sup> (P25) T cells both**  
625 **recognize their cognate peptides.** (a) Representative histogram of Nur77 expression in P25 T  
626 cells after 2 hours of co-culture with macrophages and (b) time course of Nur77 MFI in P25 T  
627 cells. (c) Representative histogram of CD69 in P25 T cells after 2 hours of co-culture with  
628 macrophages and (d) time course of CD69 MFI in P25 T cells. (e) Representative histogram of  
629 Nur77 in TB10Rg3 T cells after 2 hours of co-culture and (f) time course of Nur77 MFI in TB10Rg3  
630 T cells. (g) Representative histogram of CD69 in TB10Rg3 T cells at 2 hours of co-culture with  
631 macrophages and (h) time course of CD69 MFI in TB10Rg3 T cells. (i) CD69 MFI and (j) IFN $\gamma$   
632 production by P25 T cells after 72 hours of co-culture. (k) CD69 MFI and (l) IFN $\gamma$  production by  
633 TB10Rg3 cells after 72 hours of co-culture. MFI, mean fluorescence intensity; m $\phi$ , macrophage.  
634

635 **Figure 2. Ag85b-specific CD4<sup>+</sup> T cells, but not TB10.4-specific CD8<sup>+</sup> T cells, inhibit bacterial**  
636 **growth *in vitro*.** Matched (H-2<sup>b</sup>) or mismatched (H-2<sup>k</sup>) macrophages were infected with H37Rv  
637 for 2 hours, and then, one day post-infection, T cells were added. CFU were determined 4 days  
638 later. Separately, TB10.4 or Ag85b peptide was added to Mtb-infected (H-2<sup>b</sup>) macrophages, and  
639 then T cells were added. Results are representative of at least three experiments. Statistical  
640 testing was by one-way ANOVA, using the Dunnett posttest compared to d5. \*, #, p<0.05; \*\*,  
641 p<0.01; \*\*\*, p<0.005; \*\*\*\*, p<0.0001.

642  
643 **Figure 3. Ag85b-specific CD4<sup>+</sup> T cells, but not TB10.4-specific CD8<sup>+</sup> T cells, recognize Mtb-**  
644 **infected macrophages.** (a-d) T cells were co-cultured with peptide-pulsed, Mtb-infected, or  
645 uninfected macrophages for 2 hours. (a) Representative histogram of Nur77 expression in P25 T  
646 cells and the normalized Nur77 MFI. (b) Representative histogram of CD69 expression in P25 T  
647 cells and the normalized CD69 MFI. (c) Representative histogram of Nur77 in TB10Rg3 T cells

648 and the normalized Nur77 MFI. (d) Representative histogram of CD69 expression in TB10Rg3 T  
649 cells and the normalized CD69 MFI. (e-f) TB10Rg3 T cells were co-cultured with uninfected,  
650 peptide-pulsed, or Mtb-infected macrophages for 2 hours on d1, d3, and d5 post infection.  
651 Normalized expression of (e) Nur77 or (f) CD69 by TB10Rg3 T cells. P25 (g) or TB10Rg3 (h) T  
652 cells were co-cultured with uninfected, peptide-pulsed, or Mtb-infected macrophages, and IFN $\gamma$   
653 production was measured after 72 hours. Figures are representative of at least 5 (a-d, TB10Rg3),  
654 2 (a-d, P25), or 3 (e-h) experiments. Statistical analysis was done by one-way ANOVA with  
655 Dunnett posttest (a-d) or two-way ANOVA with Sidak posttest (g-h). \*, p<0.05; \*\*, p<0.01; and \*\*\*,  
656 p<0.005.

657

658 **Figure 4. TB10Rg3 CD8<sup>+</sup> T cells do not recognize lung APCs from infected mice.** (a-d) T cell  
659 proliferation after coculture with lung APC from infected mice, with or without cognate peptide, or  
660 uninfected TGPM, based on eFluor450 fluorescence dilution after 72 hours. Representative flow  
661 plot (a) and quantification (b) of C7 T cell proliferation. Representative flow plot (c) and  
662 quantification (d) of TB10Rg3 T cell proliferation. (e) Bacterial burden in the lung APCs during *in*  
663 *vitro* culture over the course of the experiment in the absence of T cells. Representative of 4  
664 (TB10Rg3) or 2 (C7) experiments.

665

666 **Figure 5. TB10Rg3 and P25 T cells can recognize macrophages infected with *Listeria***  
667 ***monocytogenes* expressing TB10.4 and Ag85b proteins, respectively.** (a) Representative  
668 flow plots showing Nur77 induction by TB10Rg3 T cells after co-culture with macrophages  
669 infected with  $\Delta$ ActA.TB10 (top row) or  $\Delta$ LL0.TB10 (bottom row) *Listeria*. (b) Analysis of the  
670 frequency of Nur77-expressing TB10Rg3 T cells (b, d), or normalized MFI (c, e), after co-culture  
671 with  $\Delta$ ActA.TB10 (b, c) or  $\Delta$ LL0.TB10 (d, e) infected macrophages. (f) Representative flow plots  
672 showing Nur77 induction by P25 population after co-culture with macrophages infected with

673  $\Delta$ ActA.TB10 (top row) or  $\Delta$ LLO.TB10 (bottom row) *Listeria*. (g) Analysis of the frequency of Nur77-  
674 expressing P25 T cells and (h) normalized MFI of P25 T cells. Representative of at least two  
675 experiments. Statistical testing by one-way ANOVA with Dunnett posttest. \*,  $p < 0.05$ ; \*\*,  $p < 0.01$ ;  
676 and \*\*\*,  $p < 0.005$ .

677

678 **Figure 6. Probing potential mechanisms for lack of recognition by TB10Rg3 T cells.** (a-c)  
679 EsxG (TB10.4) and its partner EsxH were overexpressed together in H37Rv to determine whether  
680 increasing TB10.4 abundance would lead to recognition of infected macrophages (esxGH-  
681 OE.Mtb). (a) Tetracycline treatment of esxGH-OE.Mtb in broth culture induces esxG and esxH,  
682 but not fbpB and sigA, mRNA as measured by qPCR. Fold-induction was normalized to baseline  
683 (i.e., uninduced). IFN $\gamma$  production by (b) P25 or (c) TB10Rg3 T cells after co-culture with  
684 macrophages infected with uninduced or induced esxGH-OE.Mtb. (d-g) MHC class I and II  
685 expression by Mtb infected-macrophages. Representative histograms (d, f) and (e, g) fold-change  
686 of MHC class I (d, e) or class II (f, g) expression on infected cells. (h) P25 and (i) TB10Rg3  
687 production of IFN $\gamma$  after co-culture with macrophages pulsed with titrated amounts of  $\gamma$ -irradiated  
688 (non-viable) H37Rv. Data is representative of 3 experiments. Statistical testing by one-way  
689 ANOVA with Dunnett posttest. \*,  $p < 0.05$ ; \*\*,  $p < 0.01$ ; and \*\*\*,  $p < 0.005$ .

690

691 **Figure 7. Polyclonal CD8<sup>+</sup> T cells from the lungs of Mtb-infected mice recognize infected**  
692 **macrophages.** IFN $\gamma$  production by polyclonal CD4<sup>+</sup> (a) or CD8<sup>+</sup> (b) T cells after co-culture with  
693 either MHC-matched (H-2<sup>b</sup>) or MHC-mismatched (H-2<sup>k</sup>), Mtb-infected macrophages. IFN $\gamma$   
694 production by TB10.4<sub>4-11</sub>-tetramer-depleted (c) or tetramer-enriched (d) polyclonal CD8<sup>+</sup> T cells  
695 after co-culture with either MHC-matched (H-2<sup>b</sup>) or MHC-mismatched (H-2<sup>k</sup>), Mtb-infected  
696 macrophages. Data is representative of at least 2 experiments. Statistical testing by a two-tailed,  
697 unpaired Student's T test. \*,  $p < 0.05$ ; \*\*,  $p < 0.01$ ; and \*\*\*,  $p < 0.005$ .

698

699 **Supplemental Legends:**

700 **S1 Supplemental Figure. TB10.4<sub>4-11</sub>-tetramer positive CD8<sup>+</sup> dominates the pulmonary CD8<sup>+</sup>**

701 **T cell response during Mtb infection in C57BL/6 mice.** Representative flow plot showing the

702 percent of TB10.4<sub>4-11</sub>-tetramer positive CD8<sup>+</sup> T cells among lung cells isolated from mice

703 infected with Erdman via the aerosol route 6 weeks post-infection.

704



## 705 **Acknowledgements**

706           We would like to thank Dr. Kenneth Rock (University of Massachusetts Medical School,  
707 MA) for the generous gift of C57BL/6  $K^{b-/-}D^{b-/-}$  (MHC  $I^{-/-}$ ) mice. We thank Barry Kriegsman for  
708 critical reading of the manuscript. We also thank the Animal Medicine team at University of  
709 Massachusetts Medical School (Worcester, MA) for their technical assistance. This study was  
710 funded by grants from the National Institutes of Health (R01 AI106725, R01 AI123286).

711

712 **References:**

- 713 1. Flynn JL, Chan J. Immune evasion by Mycobacterium tuberculosis: living with the  
714 enemy. *Current Opinion in Immunology*. 2003;15(4):450. doi: 10.1016/s0952-7915(03)00075-x.
- 715 2. Orme IM. Vaccines to prevent tuberculosis infection rather than disease: Physiological  
716 and immunological aspects. *Tuberculosis (Edinb)*. 2016. doi: 10.1016/j.tube.2014.10.008.  
717 PubMed PMID: 25500316.
- 718 3. Behar SM, Carpenter SM, Booty MG, Barber DL, Jayaraman P. Orchestration of  
719 pulmonary T cell immunity during Mycobacterium tuberculosis infection: immunity interruptus.  
720 *Semin Immunol*. 2014;26(6):559-77. Epub 2014/10/15. doi: 10.1016/j.smim.2014.09.003.  
721 PubMed PMID: 25311810; PubMed Central PMCID: PMC4250436.
- 722 4. Mogue T, Goodrich ME, Ryan L, LaCourse R, North RJ. The Relative Importance of T  
723 Cell Subsets in Immunity and Immunopathology of Airborne Mycobacterium tuberculosis  
724 Infection in Mice. *The Journal of Experimental Medicine*. 2001;193(3):271-80. doi:  
725 10.1084/jem.193.3.271.
- 726 5. Pawlowski A, Jansson M, Skold M, Rottenberg ME, Kallenius G. Tuberculosis and HIV  
727 co-infection. *PLoS Pathog*. 2012;8(2):e1002464. Epub 2012/03/01. doi:  
728 10.1371/journal.ppat.1002464. PubMed PMID: 22363214; PubMed Central PMCID:  
729 PMC3280977.
- 730 6. Ginsberg AM, Ruhwald M, Mearns H, McShane H. TB vaccines in clinical development.  
731 *Tuberculosis*. 2016;99:S16-S20. doi: 10.1016/j.tube.2016.05.013.
- 732 7. Lindestam Arlehamn CS, Lewinsohn D, Sette A, Lewinsohn D. Antigens for CD4 and  
733 CD8 T cells in tuberculosis. *Cold Spring Harb Perspect Med*. 2014;4(7):a018465. Epub  
734 2014/05/24. doi: 10.1101/cshperspect.a018465. PubMed PMID: 24852051; PubMed Central  
735 PMCID: PMC4066646.
- 736 8. Pai M, Riley LW, Colford JM. Interferon- $\gamma$  assays in the immunodiagnosis of  
737 tuberculosis: a systematic review. *The Lancet Infectious Diseases*. 2004;4(12):761-76. doi:  
738 10.1016/s1473-3099(04)01206-x.
- 739 9. Srivastava S, Ernst JD. Cutting edge: Direct recognition of infected cells by CD4 T cells  
740 is required for control of intracellular Mycobacterium tuberculosis in vivo. *J Immunol*.  
741 2013;191(3):1016-20. Epub 2013/07/03. doi: 10.4049/jimmunol.1301236. PubMed PMID:  
742 23817429; PubMed Central PMCID: PMC3725655.
- 743 10. Carpenter SM, Yang JD, Lee J, Barreira-Silva P, Behar SM. Vaccine-elicited memory  
744 CD4+ T cell expansion is impaired in the lungs during tuberculosis. *PLoS Pathog*.  
745 2017;13(11):e1006704. Epub 2017/11/28. doi: 10.1371/journal.ppat.1006704. PubMed PMID:  
746 29176787.
- 747 11. Moguche AO, Musvosvi M, Penn-Nicholson A, Plumlee CR, Mearns H, Geldenhuys H,  
748 et al. Antigen Availability Shapes T Cell Differentiation and Function during Tuberculosis. *Cell*  
749 *Host Microbe*. 2017;21(6):695-706 e5. doi: 10.1016/j.chom.2017.05.012. PubMed PMID:  
750 28618268; PubMed Central PMCID: PMC5533182.
- 751 12. Bold TD, Banaei N, Wolf AJ, Ernst JD. Suboptimal activation of antigen-specific CD4+  
752 effector cells enables persistence of M. tuberculosis in vivo. *PLoS Pathog*. 2011;7(5):e1002063.  
753 Epub 2011/06/04. doi: 10.1371/journal.ppat.1002063. PubMed PMID: 21637811; PubMed  
754 Central PMCID: PMC3102708.
- 755 13. Srivastava S, Grace PS, Ernst JD. Antigen Export Reduces Antigen Presentation and  
756 Limits T Cell Control of M. tuberculosis. *Cell Host Microbe*. 2016;19(1):44-54. Epub 2016/01/15.  
757 doi: 10.1016/j.chom.2015.12.003. PubMed PMID: 26764596; PubMed Central PMCID:  
758 PMC4715867.
- 759 14. Lai R, Jeyanathan M, Afkhami S, Zganiacz A, Hammill JA, Yao Y, et al. CD11b(+)  
760 Dendritic Cell-Mediated Anti-Mycobacterium tuberculosis Th1 Activation Is Counterregulated by

- 761 CD103(+) Dendritic Cells via IL-10. *J Immunol.* 2018. Epub 2018/01/28. doi:  
762 10.4049/jimmunol.1701109. PubMed PMID: 29374077.
- 763 15. Egen JG, Rothfuchs AG, Feng CG, Horwitz MA, Sher A, Germain RN. Intravital imaging  
764 reveals limited antigen presentation and T cell effector function in mycobacterial granulomas.  
765 *Immunity.* 2011;34(5):807-19. doi: 10.1016/j.immuni.2011.03.022.
- 766 16. Serafini A, Pisu D, Palu G, Rodriguez GM, Manganeli R. The ESX-3 secretion system is  
767 necessary for iron and zinc homeostasis in *Mycobacterium tuberculosis*. *PLoS One.*  
768 2013;8(10):e78351. Epub 2013/10/25. doi: 10.1371/journal.pone.0078351. PubMed PMID:  
769 24155985; PubMed Central PMCID: PMC3796483.
- 770 17. Griffin JE, Gawronski JD, Dejesus MA, Ioerger TR, Akerley BJ, Sasseti CM. High-  
771 resolution phenotypic profiling defines genes essential for mycobacterial growth and cholesterol  
772 catabolism. *PLoS Pathog.* 2011;7(9):e1002251. Epub 2011/10/08. doi:  
773 10.1371/journal.ppat.1002251. PubMed PMID: 21980284; PubMed Central PMCID:  
774 PMC3182942.
- 775 18. Woodworth JS, Shin D, Volman M, Nunes-Alves C, Fortune SM, Behar SM.  
776 *Mycobacterium tuberculosis* directs immunofocusing of CD8+ T cell responses despite  
777 vaccination. *J Immunol.* 2011;186(3):1627-37. Epub 2010/12/24. doi:  
778 10.4049/jimmunol.1002911. PubMed PMID: 21178003; PubMed Central PMCID:  
779 PMC3133636.
- 780 19. Nunes-Alves C, Booty MG, Carpenter SM, Rothchild AC, Martin CJ, Desjardins D, et al.  
781 Human and Murine Clonal CD8+ T Cell Expansions Arise during Tuberculosis Because of TCR  
782 Selection. *PLoS Pathog.* 2015;11(5):e1004849. Epub 2015/05/07. doi:  
783 10.1371/journal.ppat.1004849. PubMed PMID: 25945999; PubMed Central PMCID:  
784 PMC4422591.
- 785 20. Skjot RLV, Brock I, Arend SM, Munk ME, Theisen M, Ottenhoff THM, et al. Epitope  
786 Mapping of the Immunodominant Antigen TB10.4 and the Two Homologous Proteins TB10.3  
787 and TB12.9, Which Constitute a Subfamily of the *esat-6* Gene Family. *Infection and Immunity.*  
788 2002;70(10):5446-53. doi: 10.1128/iai.70.10.5446-5453.2002.
- 789 21. Skjot RLV, Oettinger T, Rosenkrands I, Ravn P, Brock I, Jacobsen S, et al. Comparative  
790 Evaluation of Low-Molecular-Mass Proteins from *Mycobacterium tuberculosis* Identifies  
791 Members of the ESAT-6 Family as Immunodominant T-Cell Antigens. *Infection and Immunity.*  
792 2000;68(1):214-20. doi: 10.1128/iai.68.1.214-220.2000.
- 793 22. Lewinsohn DA, Swarbrick GM, Park B, Cansler ME, Null MD, Toren KG, et al.  
794 Comprehensive definition of human immunodominant CD8 antigens in tuberculosis. *NPJ*  
795 *Vaccines.* 2017;2(1). doi: 10.1038/s41541-017-0008-6. PubMed PMID: 28775896; PubMed  
796 Central PMCID: PMC5538316.
- 797 23. Carpenter SM, Nunes-Alves C, Booty MG, Way SS, Behar SM. A Higher Activation  
798 Threshold of Memory CD8+ T Cells Has a Fitness Cost That Is Modified by TCR Affinity during  
799 Tuberculosis. *PLoS Pathog.* 2016;12(1):e1005380. Epub 2016/01/09. doi:  
800 10.1371/journal.ppat.1005380. PubMed PMID: 26745507; PubMed Central PMCID:  
801 PMC4706326.
- 802 24. Tamura T, Ariga H, Kinashi T, Uehara S, Kikuchi T, Nakada M, et al. The role of  
803 antigenic peptide in CD4+ T helper phenotype development in a T cell receptor transgenic  
804 model. *Int Immunol.* 2004;16(12):1691-9. Epub 2004/10/13. doi: 10.1093/intimm/dxh170.  
805 PubMed PMID: 15477229.
- 806 25. Moran AE, Holzapfel KL, Xing Y, Cunningham NR, Maltzman JS, Punt J, et al. T cell  
807 receptor signal strength in Treg and iNKT cell development demonstrated by a novel fluorescent  
808 reporter mouse. *J Exp Med.* 2011;208(6):1279-89. Epub 2011/05/25. doi:  
809 10.1084/jem.20110308. PubMed PMID: 21606508; PubMed Central PMCID:  
810 PMC3173240.

- 811 26. Bastidas S, Graw F, Smith MZ, Kuster H, Gunthard HF, Oxenius A. CD8+ T cells are  
812 activated in an antigen-independent manner in HIV-infected individuals. *J Immunol.*  
813 2014;192(4):1732-44. Epub 2014/01/22. doi: 10.4049/jimmunol.1302027. PubMed PMID:  
814 24446519.
- 815 27. Mariani F, Cappelli G, Riccardi G, Colizzi V. Mycobacterium tuberculosis H37Rv  
816 comparative gene-expression analysis in synthetic medium and human macrophage. *Gene.*  
817 2000. PubMed PMID: 10940566.
- 818 28. Rothchild AC, Jayaraman P, Nunes-Alves C, Behar SM. iNKT cell production of GM-  
819 CSF controls Mycobacterium tuberculosis. *PLoS Pathog.* 2014;10(1):e1003805. Epub  
820 2014/01/07. doi: 10.1371/journal.ppat.1003805. PubMed PMID: 24391492; PubMed Central  
821 PMCID: PMC3879349.
- 822 29. Okamoto I, Kohno K, Tanimoto T, Ikegami H, Kurimoto M. Development of CD8+  
823 effector T cells is differentially regulated by IL-18 and IL-12. *J Immunol.* 1999;162(6):3202-11.  
824 Epub 1999/03/27. PubMed PMID: 10092771.
- 825 30. Akdis M, Burgler S, Cramer R, Eiwegger T, Fujita H, Gomez E, et al. Interleukins, from 1  
826 to 37, and interferon-gamma: receptors, functions, and roles in diseases. *J Allergy Clin*  
827 *Immunol.* 2011;127(3):701-21 e1-70. Epub 2011/03/08. doi: 10.1016/j.jaci.2010.11.050.  
828 PubMed PMID: 21377040.
- 829 31. Srivastava S, Ernst JD, Desvignes L. Beyond macrophages: the diversity of  
830 mononuclear cells in tuberculosis. *Immunological Reviews.* 2014;262(1):179-92. doi:  
831 10.1111/imr.12217.
- 832 32. Skold M, Behar SM. Tuberculosis Triggers a Tissue-Dependent Program of  
833 Differentiation and Acquisition of Effector Functions by Circulating Monocytes. *The Journal of*  
834 *Immunology.* 2008;181(9):6349-60. doi: 10.4049/jimmunol.181.9.6349.
- 835 33. Gonzalez-Juarrero M, Shim TS, Kipnis A, Junqueira-Kipnis AP, Orme IM. Dynamics of  
836 Macrophage Cell Populations During Murine Pulmonary Tuberculosis. *The Journal of*  
837 *Immunology.* 2003;171(6):3128-35. doi: 10.4049/jimmunol.171.6.3128.
- 838 34. Gallegos AM, Pamer EG, Glickman MS. Delayed protection by ESAT-6-specific effector  
839 CD4+ T cells after airborne M. tuberculosis infection. *J Exp Med.* 2008;205(10):2359-68. Epub  
840 2008/09/10. doi: 10.1084/jem.20080353. PubMed PMID: 18779346; PubMed Central PMCID:  
841 PMC2556792.
- 842 35. Ilghari D, Lightbody KL, Veverka V, Waters LC, Muskett FW, Renshaw PS, et al.  
843 Solution structure of the Mycobacterium tuberculosis EsxG.EsxH complex: functional  
844 implications and comparisons with other M. tuberculosis Esx family complexes. *J Biol Chem.*  
845 2011;286(34):29993-30002. Epub 2011/07/07. doi: 10.1074/jbc.M111.248732. PubMed PMID:  
846 21730061; PubMed Central PMCID: PMC3191040.
- 847 36. Meng L, Tong J, Wang H, Tao C, Wang Q, Niu C, et al. PPE38 Protein of  
848 Mycobacterium tuberculosis Inhibits Macrophage MHC Class I Expression and Dampens CD8+  
849 T Cell Responses. *Front Cell Infect Microbiol.* 2017;7:68. Epub 2017/03/30. doi:  
850 10.3389/fcimb.2017.00068. PubMed PMID: 28348981; PubMed Central PMCID:  
851 PMC35346565.
- 852 37. Noss EH, Harding CV, Boom WH. Mycobacterium tuberculosis inhibits MHC class II  
853 antigen processing in murine bone marrow macrophages. *Cell Immunol.* 2000;201(1):63-74.  
854 Epub 2000/05/12. doi: 10.1006/cimm.2000.1633. PubMed PMID: 10805975.
- 855 38. Winau F, Weber S, Sad S, de Diego J, Hoops SL, Breiden B, et al. Apoptotic vesicles  
856 crossprime CD8 T cells and protect against tuberculosis. *Immunity.* 2006;24(1):105-17. Epub  
857 2006/01/18. doi: 10.1016/j.immuni.2005.12.001. PubMed PMID: 16413927.
- 858 39. Smith VL, Cheng Y, Bryant BR, Schorey JS. Exosomes function in antigen presentation  
859 during an in vivo Mycobacterium tuberculosis infection. *Sci Rep.* 2017;7:43578. Epub  
860 2017/03/07. doi: 10.1038/srep43578. PubMed PMID: 28262829; PubMed Central PMCID:  
861 PMC5338015.

- 862 40. Srivastava S, Ernst JD. Cell-to-cell transfer of *M. tuberculosis* antigens optimizes CD4 T  
863 cell priming. *Cell Host Microbe*. 2014;15(6):741-52. Epub 2014/06/13. doi:  
864 10.1016/j.chom.2014.05.007. PubMed PMID: 24922576; PubMed Central PMCID:  
865 PMC4098643.
- 866 41. Schaible UE, Winau F, Sieling PA, Fischer K, Collins HL, Hagens K, et al. Apoptosis  
867 facilitates antigen presentation to T lymphocytes through MHC-I and CD1 in tuberculosis. *Nat*  
868 *Med*. 2003;9(8):1039-46. doi: 10.1038/nm906. PubMed PMID: 12872166.
- 869 42. Divangahi M, Chen M, Gan H, Desjardins D, Hickman TT, Lee DM, et al. *Mycobacterium*  
870 *tuberculosis* evades macrophage defenses by inhibiting plasma membrane repair. *Nat Immunol*.  
871 2009;10(8):899-906. Epub 2009/06/30. doi: 10.1038/ni.1758. PubMed PMID: 19561612;  
872 PubMed Central PMCID: PMC2730354.
- 873 43. Jayaraman P, Sada-Ovalle I, Nishimura T, Anderson AC, Kuchroo VK, Remold HG, et  
874 al. IL-1beta promotes antimicrobial immunity in macrophages by regulating TNFR signaling and  
875 caspase-3 activation. *J Immunol*. 2013;190(8):4196-204. Epub 2013/03/15. doi:  
876 10.4049/jimmunol.1202688. PubMed PMID: 23487424; PubMed Central PMCID:  
877 PMC3622150.
- 878 44. Gonzalez-Juarrero M, Orme IM. Characterization of Murine Lung Dendritic Cells Infected  
879 with *Mycobacterium tuberculosis*. *Infection and Immunity*. 2001;69(2):1127-33. doi:  
880 10.1128/IAI.69.2.1127-1133.2001.
- 881 45. Bodnar KA, Serbina NV, Flynn JL. Fate of *Mycobacterium tuberculosis* within murine  
882 dendritic cells. *Infect Immun*. 2001;69(2):800-9. Epub 2001/02/13. doi: 10.1128/IAI.69.2.800-  
883 809.2001. PubMed PMID: 11159971; PubMed Central PMCID: PMC97955.
- 884 46. Serbina NV, Flynn JL. Early emergence of CD8(+) T cells primed for production of type 1  
885 cytokines in the lungs of *Mycobacterium tuberculosis*-infected mice. *Infect Immun*.  
886 1999;67(8):3980-8. Epub 1999/07/23. PubMed PMID: 10417164; PubMed Central PMCID:  
887 PMC96683.
- 888 47. Nepal RM, Vesosky B, Turner J, Bryant P. DM, but not cathepsin L, is required to control  
889 an aerosol infection with *Mycobacterium tuberculosis*. *Journal of Leukocyte Biology*.  
890 2008;84(4):1011-8. doi: 10.1189/jlb.1207852.
- 891 48. Serbina NV, Liu CC, Scanga CA, Flynn JL. CD8+ CTL from lungs of *Mycobacterium*  
892 *tuberculosis*-infected mice express perforin in vivo and lyse infected macrophages. *J Immunol*.  
893 2000;165(1):353-63. Epub 2000/06/22. doi: 10.4049/jimmunol.165.1.353. PubMed PMID:  
894 10861072.
- 895 49. Cowley SC, Elkins KL. CD4+ T cells mediate IFN-gamma-independent control of  
896 *Mycobacterium tuberculosis* infection both in vitro and in vivo. *J Immunol*. 2003. PubMed PMID:  
897 14568944.
- 898 50. Green AM, Difazio R, Flynn JL. IFN-gamma from CD4 T cells is essential for host  
899 survival and enhances CD8 T cell function during *Mycobacterium tuberculosis* infection. *J*  
900 *Immunol*. 2013;190(1):270-7. Epub 2012/12/13. doi: 10.4049/jimmunol.1200061. PubMed  
901 PMID: 23233724; PubMed Central PMCID: PMC3683563.
- 902 51. Caccamo N, Pietra G, Sullivan LC, Brooks AG, Prezzemolo T, La Manna MP, et al.  
903 Human CD8 T lymphocytes recognize *Mycobacterium tuberculosis* antigens presented by HLA-  
904 E during active tuberculosis and express type 2 cytokines. *Eur J Immunol*. 2015;45(4):1069-81.  
905 doi: 10.1002/eji.201445193. PubMed PMID: 25631937.
- 906 52. Lewinsohn DA, Heinzl AS, Gardner JM, Zhu L, Alderson MR, Lewinsohn DM.  
907 *Mycobacterium tuberculosis*-specific CD8+ T cells preferentially recognize heavily infected cells.  
908 *Am J Respir Crit Care Med*. 2003;168(11):1346-52. Epub 2003/09/13. doi:  
909 10.1164/rccm.200306-837OC. PubMed PMID: 12969871.
- 910 53. Lewinsohn DM, Zhu L, Madison VJ, Dillon DC, Fling SP, Reed SG, et al. Classically  
911 restricted human CD8+ T lymphocytes derived from *Mycobacterium tuberculosis*-infected cells:

- 912 definition of antigenic specificity. *J Immunol.* 2001;166(1):439-46. Epub 2000/12/21. doi:  
913 10.4049/jimmunol.166.1.439. PubMed PMID: 11123322.
- 914 54. van der Wel N, Hava D, Houben D, Fluitsma D, van Zon M, Pierson J, et al. M.  
915 tuberculosis and *M. leprae* translocate from the phagolysosome to the cytosol in myeloid cells.  
916 *Cell.* 2007;129(7):1287-98. Epub 2007/07/03. doi: 10.1016/j.cell.2007.05.059. PubMed PMID:  
917 17604718.
- 918 55. Simeone R, Bobard A, Lippmann J, Bitter W, Majlessi L, Brosch R, et al. Phagosomal  
919 rupture by *Mycobacterium tuberculosis* results in toxicity and host cell death. *PLoS Pathog.*  
920 2012;8(2):e1002507. Epub 2012/02/10. doi: 10.1371/journal.ppat.1002507. PubMed PMID:  
921 22319448; PubMed Central PMCID: PMCPMC3271072.
- 922 56. Lindenstrom T, Aagaard C, Christensen D, Agger EM, Andersen P. High-frequency  
923 vaccine-induced CD8(+) T cells specific for an epitope naturally processed during infection with  
924 *Mycobacterium tuberculosis* do not confer protection. *Eur J Immunol.* 2014. doi:  
925 10.1002/eji.201344358. PubMed PMID: 24677089; PubMed Central PMCID:  
926 PMCPMC4112357.
- 927 57. Grotzke JE, Siler AC, Lewinsohn DA, Lewinsohn DM. Secreted immunodominant  
928 *Mycobacterium tuberculosis* antigens are processed by the cytosolic pathway. *J Immunol.*  
929 2010;185(7):4336-43. Epub 2010/08/31. doi: 10.4049/jimmunol.1000801. PubMed PMID:  
930 20802151; PubMed Central PMCID: PMCPMC2988655.
- 931 58. Woodworth JS, Fortune SM, Behar SM. Bacterial protein secretion is required for  
932 priming of CD8+ T cells specific for the *Mycobacterium tuberculosis* antigen CFP10. *Infect*  
933 *Immun.* 2008;76(9):4199-205. Epub 2008/07/02. doi: 10.1128/IAI.00307-08. PubMed PMID:  
934 18591224; PubMed Central PMCID: PMCPMC2519428.
- 935 59. Shafiani S, Tucker-Heard G, Kariyone A, Takatsu K, Urdahl KB. Pathogen-specific  
936 regulatory T cells delay the arrival of effector T cells in the lung during early tuberculosis. *J Exp*  
937 *Med.* 2010;207(7):1409-20. Epub 2010/06/16. doi: 10.1084/jem.20091885. PubMed PMID:  
938 20547826; PubMed Central PMCID: PMCPMC2901066.
- 939 60. Egen JG, Rothfuchs AG, Feng CG, Winter N, Sher A, Germain RN. Macrophage and T  
940 cell dynamics during the development and disintegration of mycobacterial granulomas.  
941 *Immunity.* 2008;28(2):271-84. Epub 2008/02/12. doi: 10.1016/j.immuni.2007.12.010. PubMed  
942 PMID: 18261937; PubMed Central PMCID: PMCPMC2390753.
- 943 61. Kamath A, Woodworth JS, Behar SM. Antigen-specific CD8+ T cells and the  
944 development of central memory during *Mycobacterium tuberculosis* infection. *J Immunol.*  
945 2006;177(9):6361-9. Epub 2006/10/24. doi: 10.4049/jimmunol.177.9.6361. PubMed PMID:  
946 17056567; PubMed Central PMCID: PMCPMC3133654.
- 947 62. Elvang T, Christensen JP, Billeskov R, Thi Kim Thanh Hoang T, Holst P, Thomsen AR,  
948 et al. CD4 and CD8 T cell responses to the *M. tuberculosis* Ag85B-TB10.4 promoted by  
949 adjuvanted subunit, adenovector or heterologous prime boost vaccination. *PLoS One.*  
950 2009;4(4):e5139. Epub 2009/04/10. doi: 10.1371/journal.pone.0005139. PubMed PMID:  
951 19357780; PubMed Central PMCID: PMCPMC2663846.
- 952 63. Billeskov R, Vingsbo-Lundberg C, Andersen P, Dietrich J. Induction of CD8 T cells  
953 against a novel epitope in TB10.4: correlation with mycobacterial virulence and the presence of  
954 a functional region of difference-1. *J Immunol.* 2007;179(6):3973-81. Epub 2007/09/06. doi:  
955 10.4049/jimmunol.179.6.3973. PubMed PMID: 17785835.
- 956 64. Weinrich Olsen A, van Pinxteren LA, Meng Okkels L, Birk Rasmussen P, Andersen P.  
957 Protection of mice with a tuberculosis subunit vaccine based on a fusion protein of antigen 85b  
958 and esat-6. *Infect Immun.* 2001;69(5):2773-8. Epub 2001/04/09. doi: 10.1128/IAI.69.5.2773-  
959 2778.2001. PubMed PMID: 11292688; PubMed Central PMCID: PMCPMC98224.
- 960 65. Brandt L, Elhay M, Rosenkrands I, Lindblad EB, Andersen P. ESAT-6 subunit  
961 vaccination against *Mycobacterium tuberculosis*. *Infect Immun.* 2000. PubMed PMID:  
962 10639447; PubMed Central PMCID: PMCPMC97206.

- 963 66. Divangahi M, Desjardins D, Nunes-Alves C, Remold HG, Behar SM. Eicosanoid  
964 pathways regulate adaptive immunity to Mycobacterium tuberculosis. *Nat Immunol.*  
965 2010;11(8):751-8. Epub 2010/07/14. doi: 10.1038/ni.1904. PubMed PMID: 20622882; PubMed  
966 Central PMCID: PMCPMC3150169.
- 967 67. Comas I, Chakravarti J, Small PM, Galagan J, Niemann S, Kremer K, et al. Human T  
968 cell epitopes of Mycobacterium tuberculosis are evolutionarily hyperconserved. *Nat Genet.*  
969 2010;42(6):498-503. Epub 2010/05/25. doi: 10.1038/ng.590. PubMed PMID: 20495566;  
970 PubMed Central PMCID: PMCPMC2883744.
- 971 68. Coscolla M, Copin R, Sutherland J, Gehre F, de Jong B, Owolabi O, et al. M.  
972 tuberculosis T Cell Epitope Analysis Reveals Paucity of Antigenic Variation and Identifies Rare  
973 Variable TB Antigens. *Cell Host Microbe.* 2015;18(5):538-48. Epub 2015/11/27. doi:  
974 10.1016/j.chom.2015.10.008. PubMed PMID: 26607161; PubMed Central PMCID:  
975 PMCPMC4758912.
- 976 69. Wolf AJ, Desvignes L, Linas B, Banaiee N, Tamura T, Takatsu K, et al. Initiation of the  
977 adaptive immune response to Mycobacterium tuberculosis depends on antigen production in the  
978 local lymph node, not the lungs. *J Exp Med.* 2008;205(1):105-15. Epub 2007/12/26. doi:  
979 10.1084/jem.20071367. PubMed PMID: 18158321; PubMed Central PMCID:  
980 PMCPMC2234384.
- 981 70. Rock JM, Hopkins FF, Chavez A, Diallo M, Chase MR, Gerrick ER, et al. Programmable  
982 transcriptional repression in mycobacteria using an orthogonal CRISPR interference platform.  
983 *Nature Microbiology.* 2017;2:16274. doi: 10.1038/nmicrobiol.2016.274.  
984

# Figure 1.

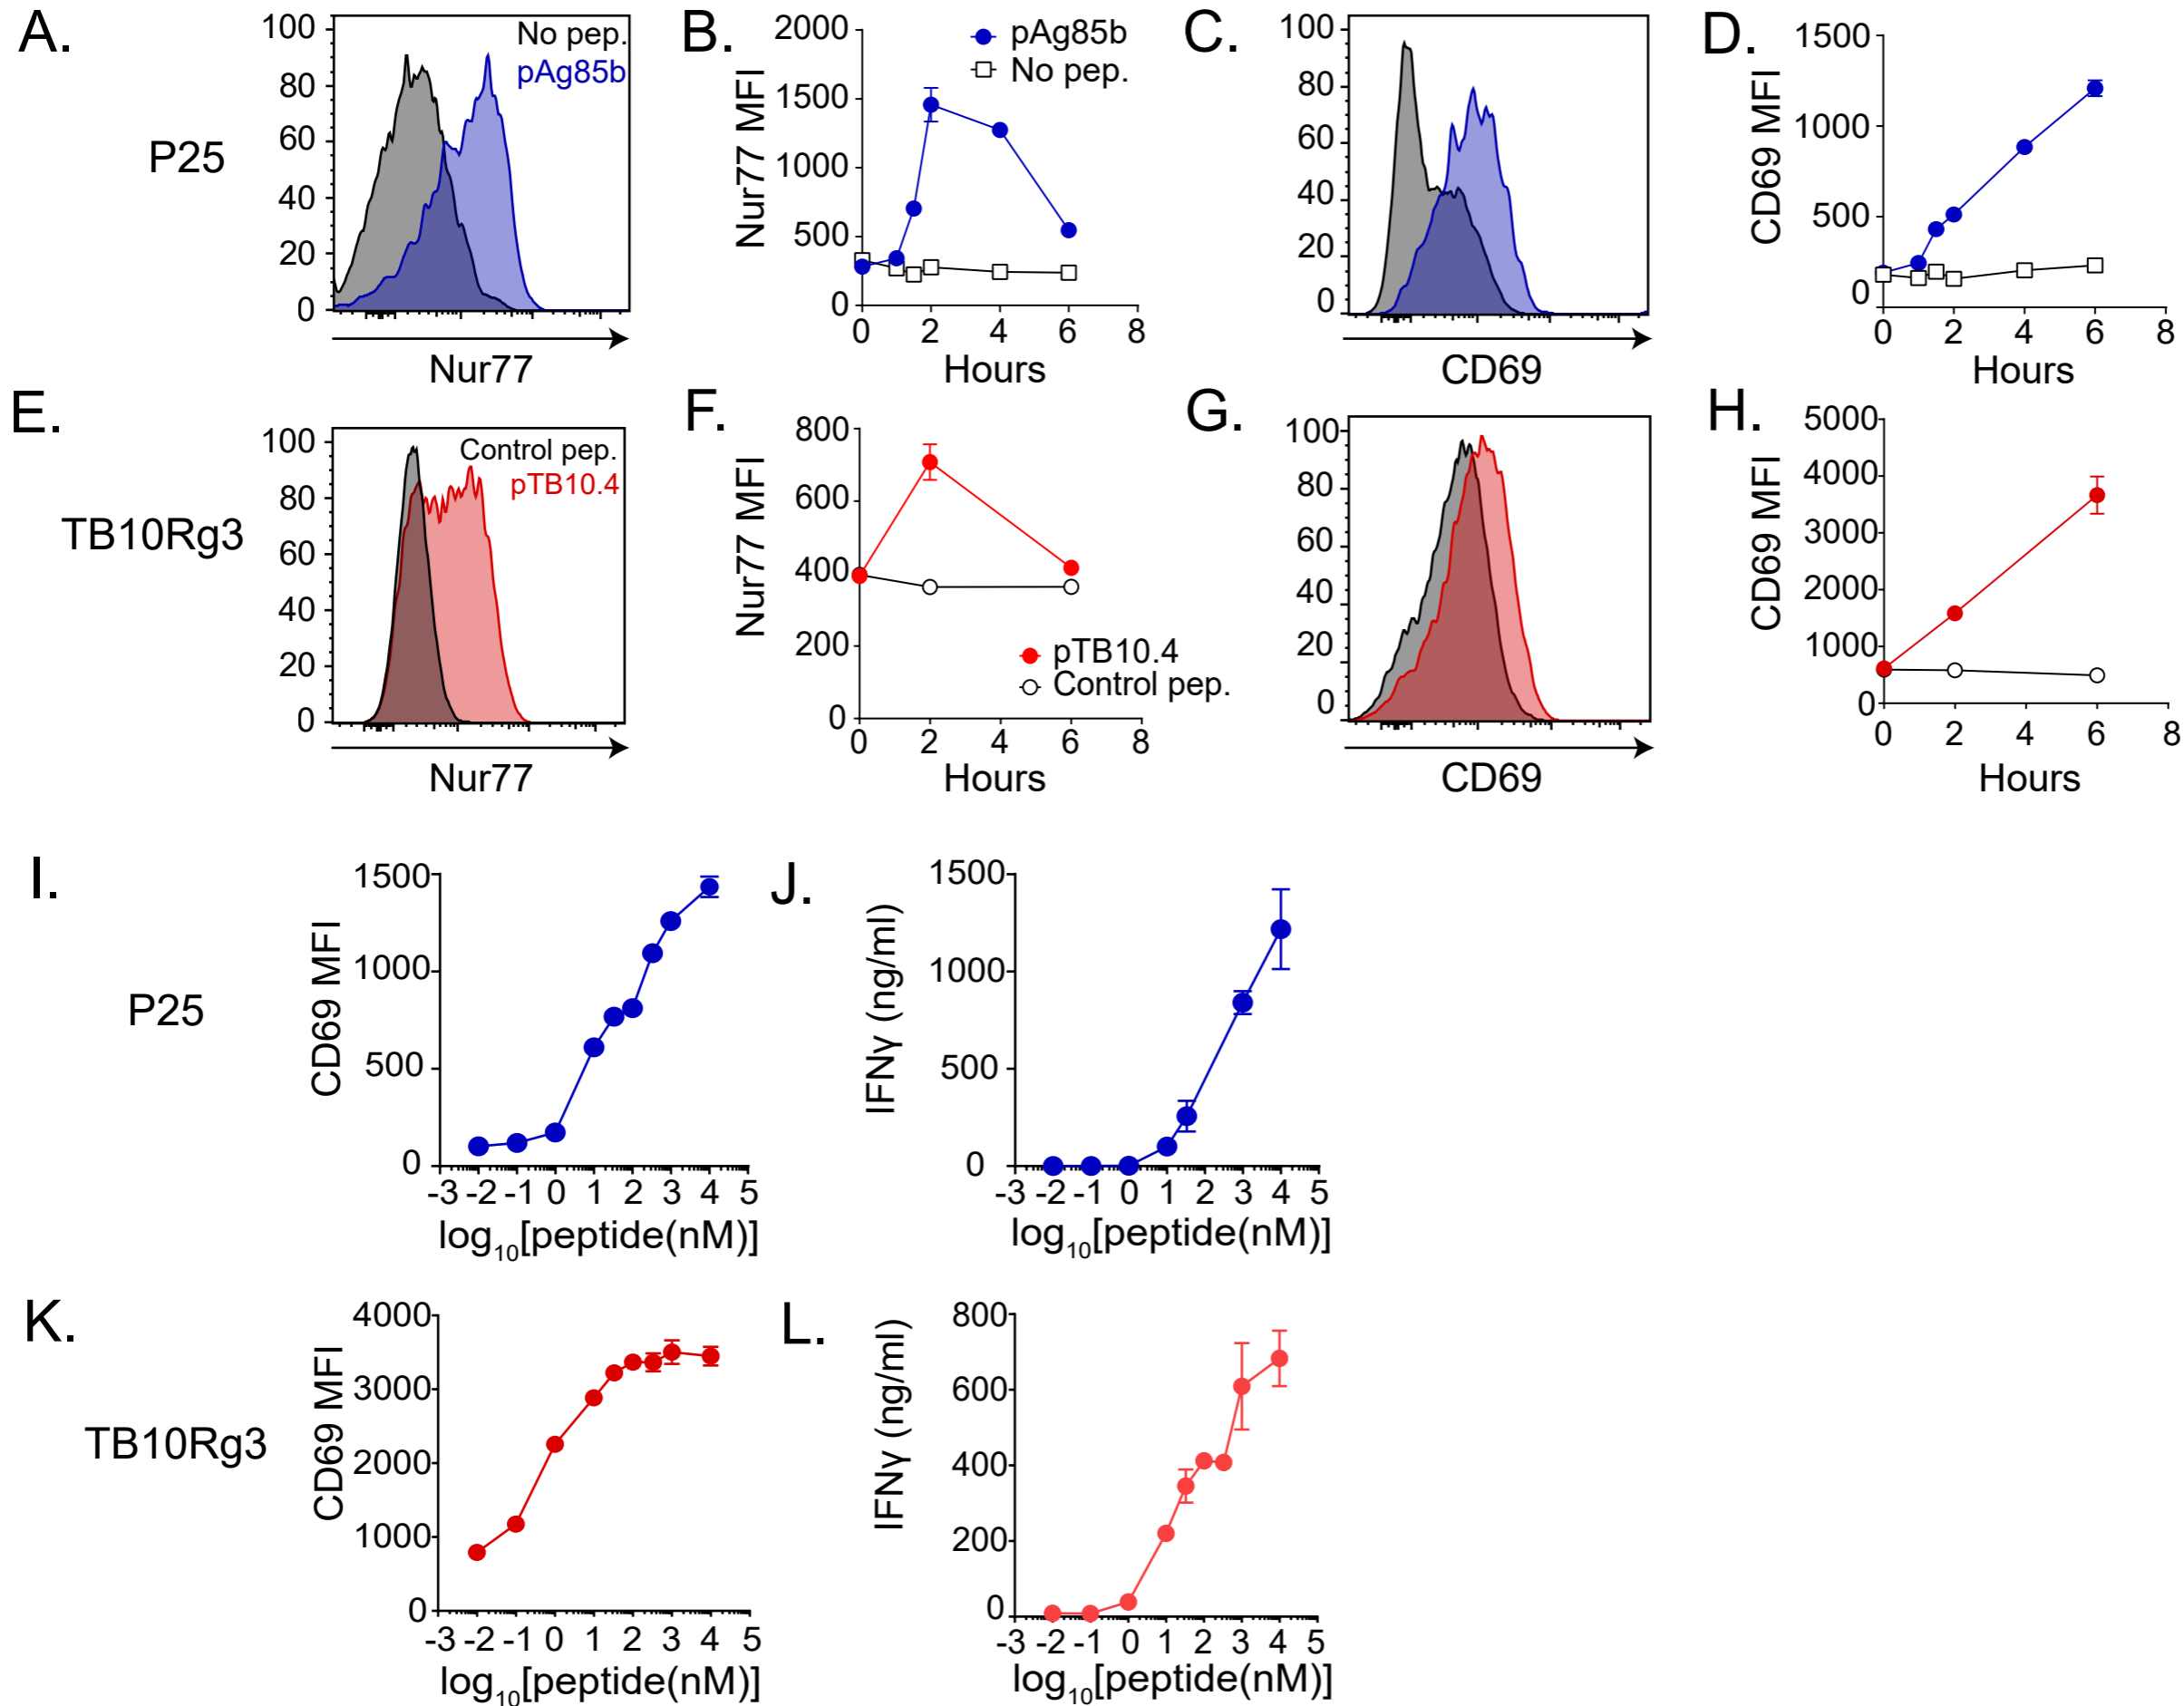



Figure 2.

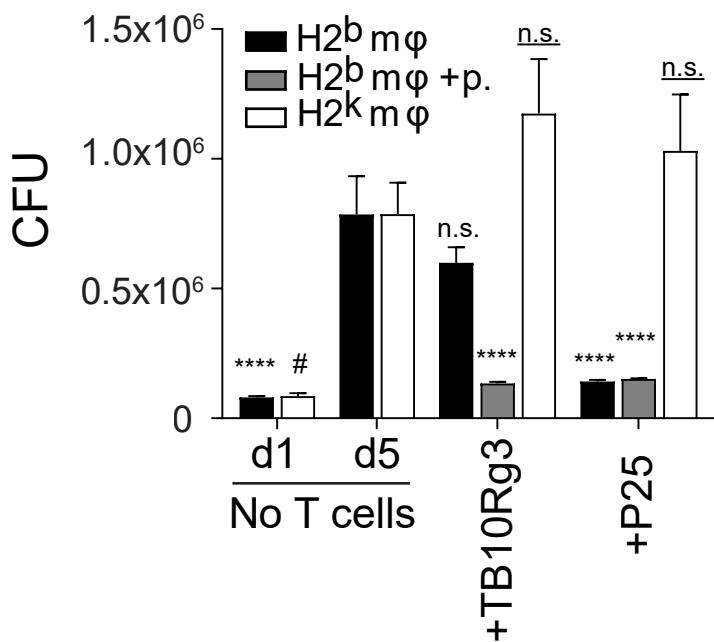

Figure 3.

**A. P25**

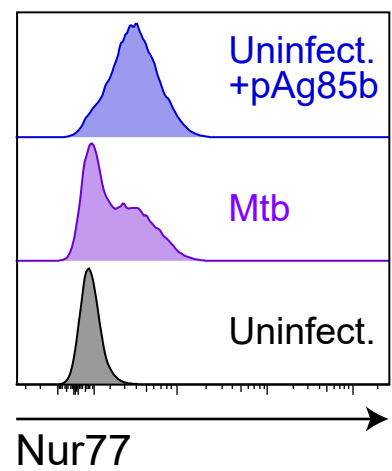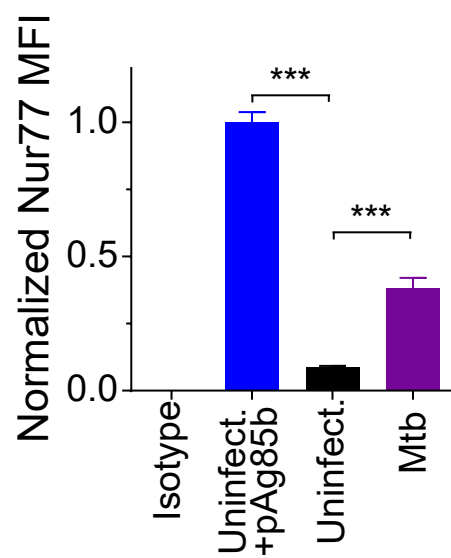

**B. P25**

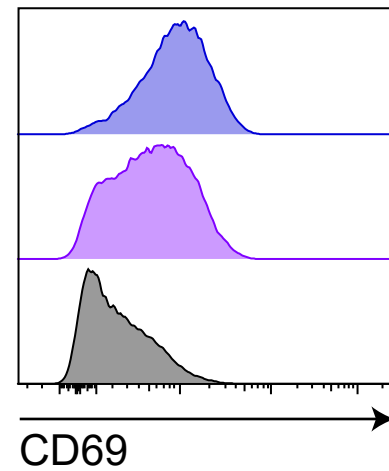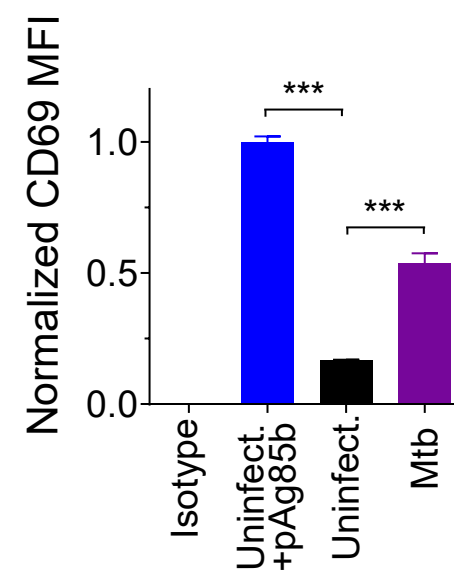

**C. TB10Rg3**

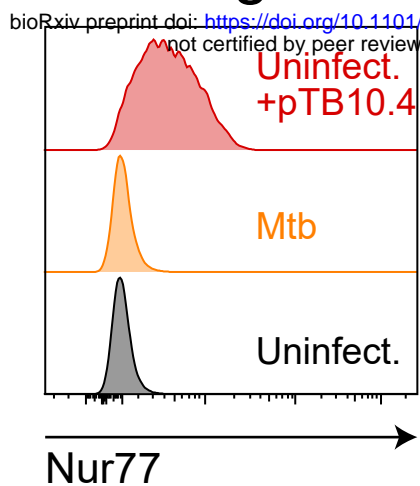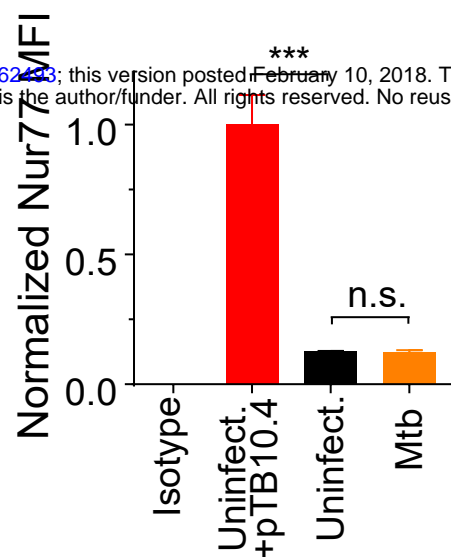

**D. TB10Rg3**

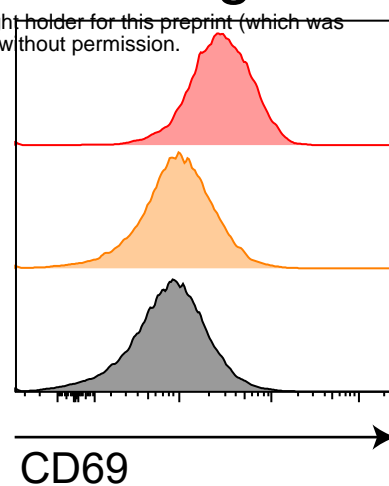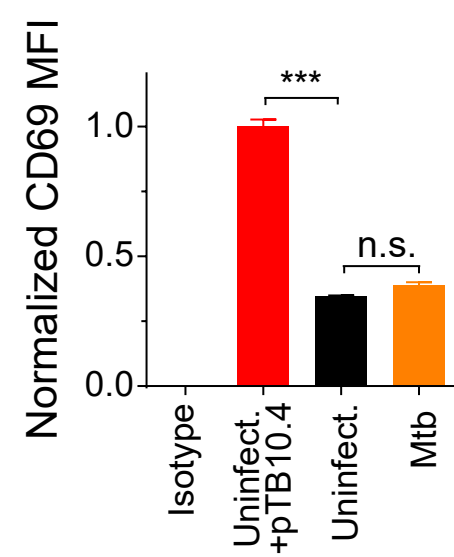

**E. TB10Rg3**

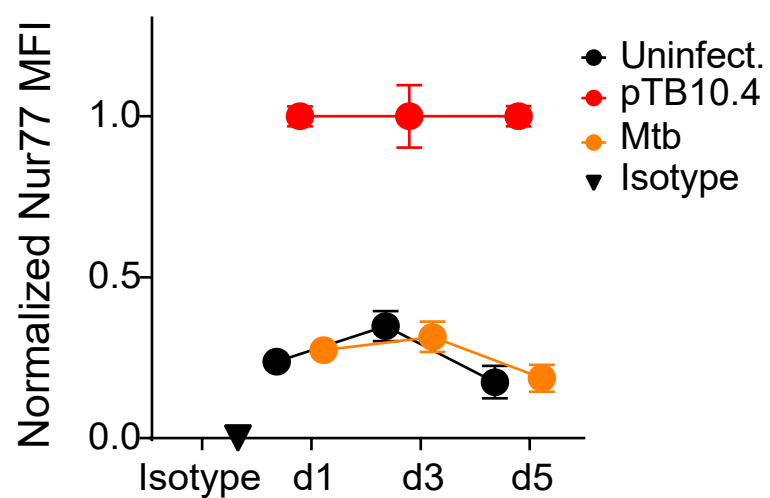

**G. P25**

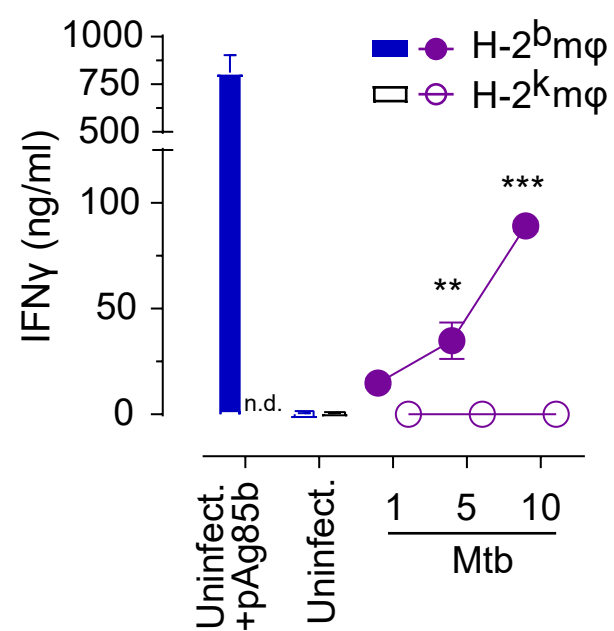

**F. TB10Rg3**

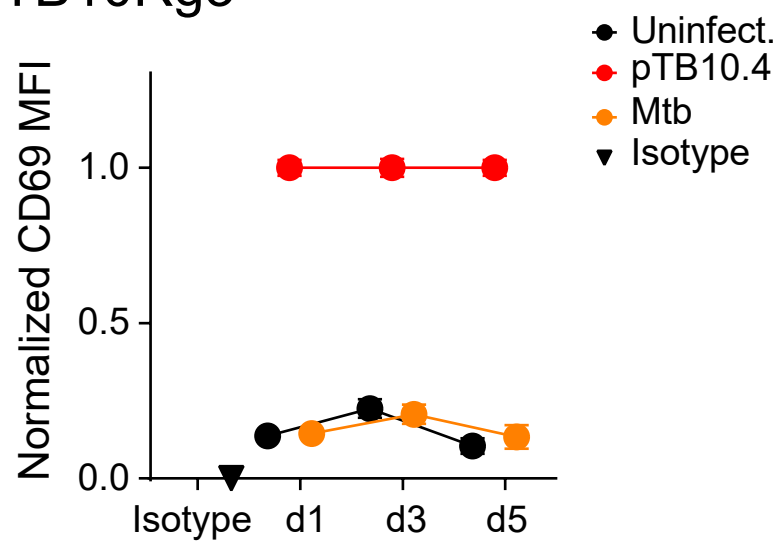

**H. TB10Rg3**

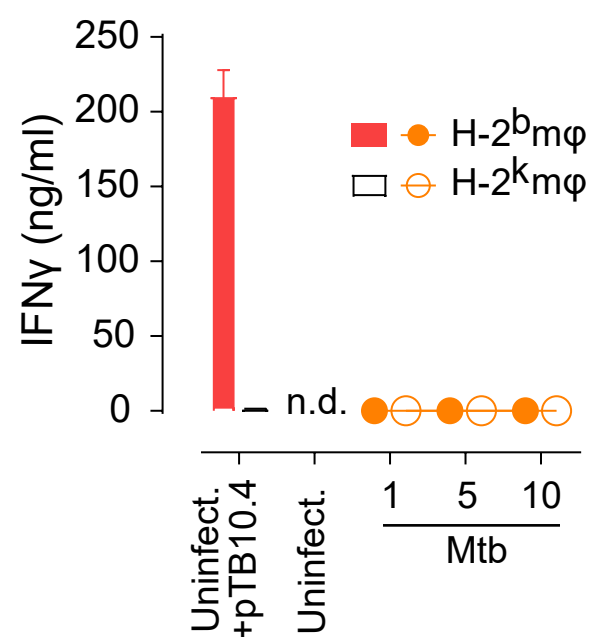

Figure 4.

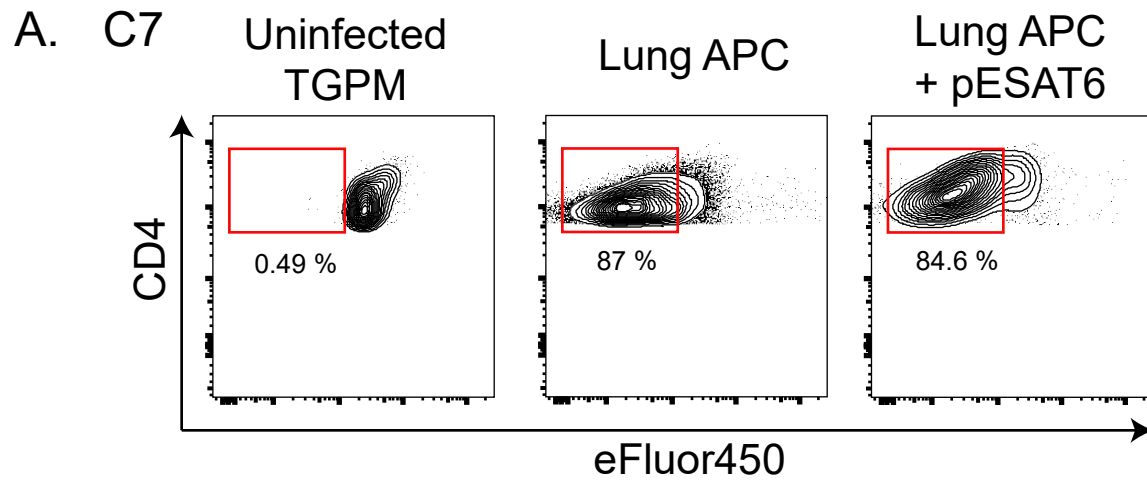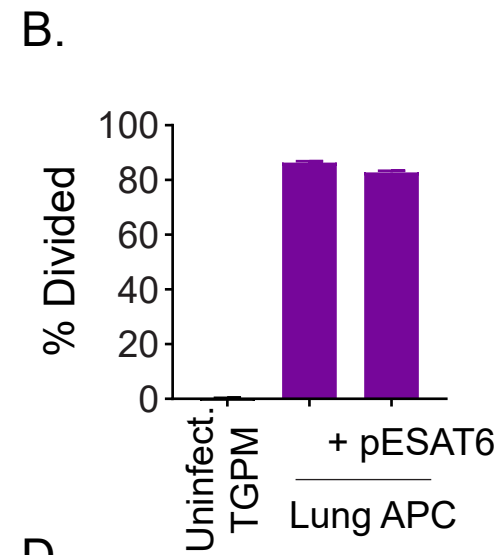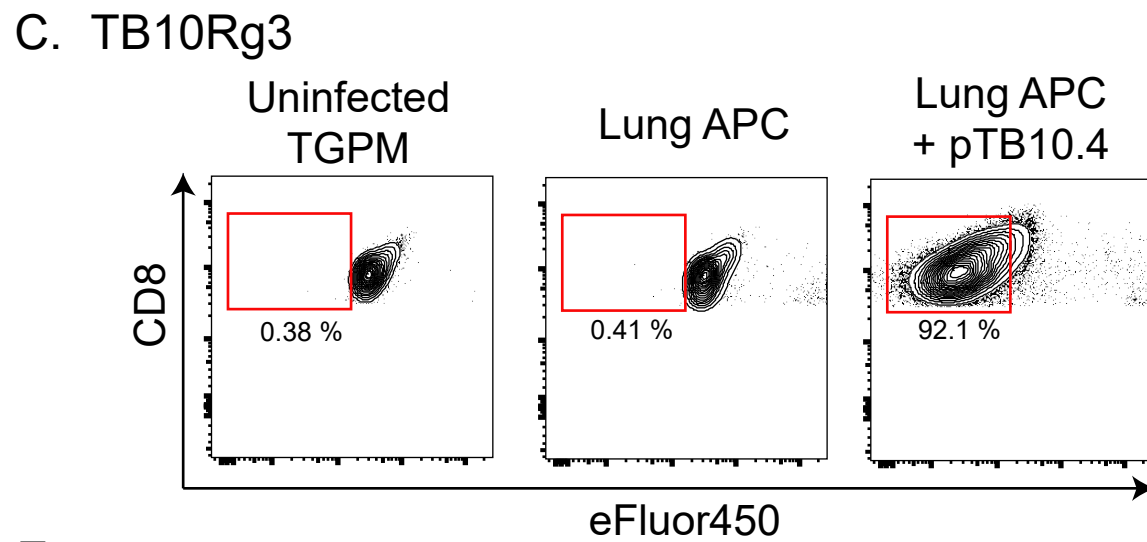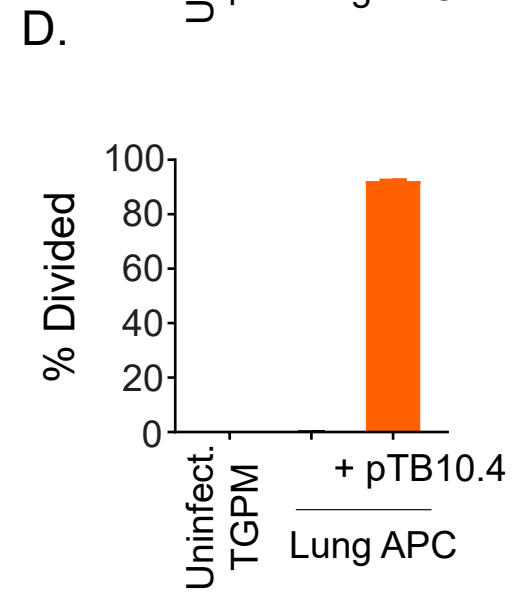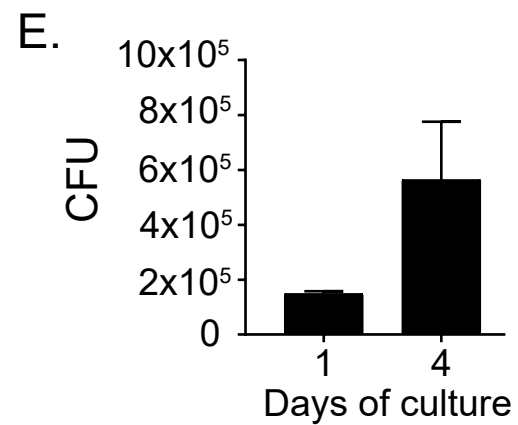

Figure 5.

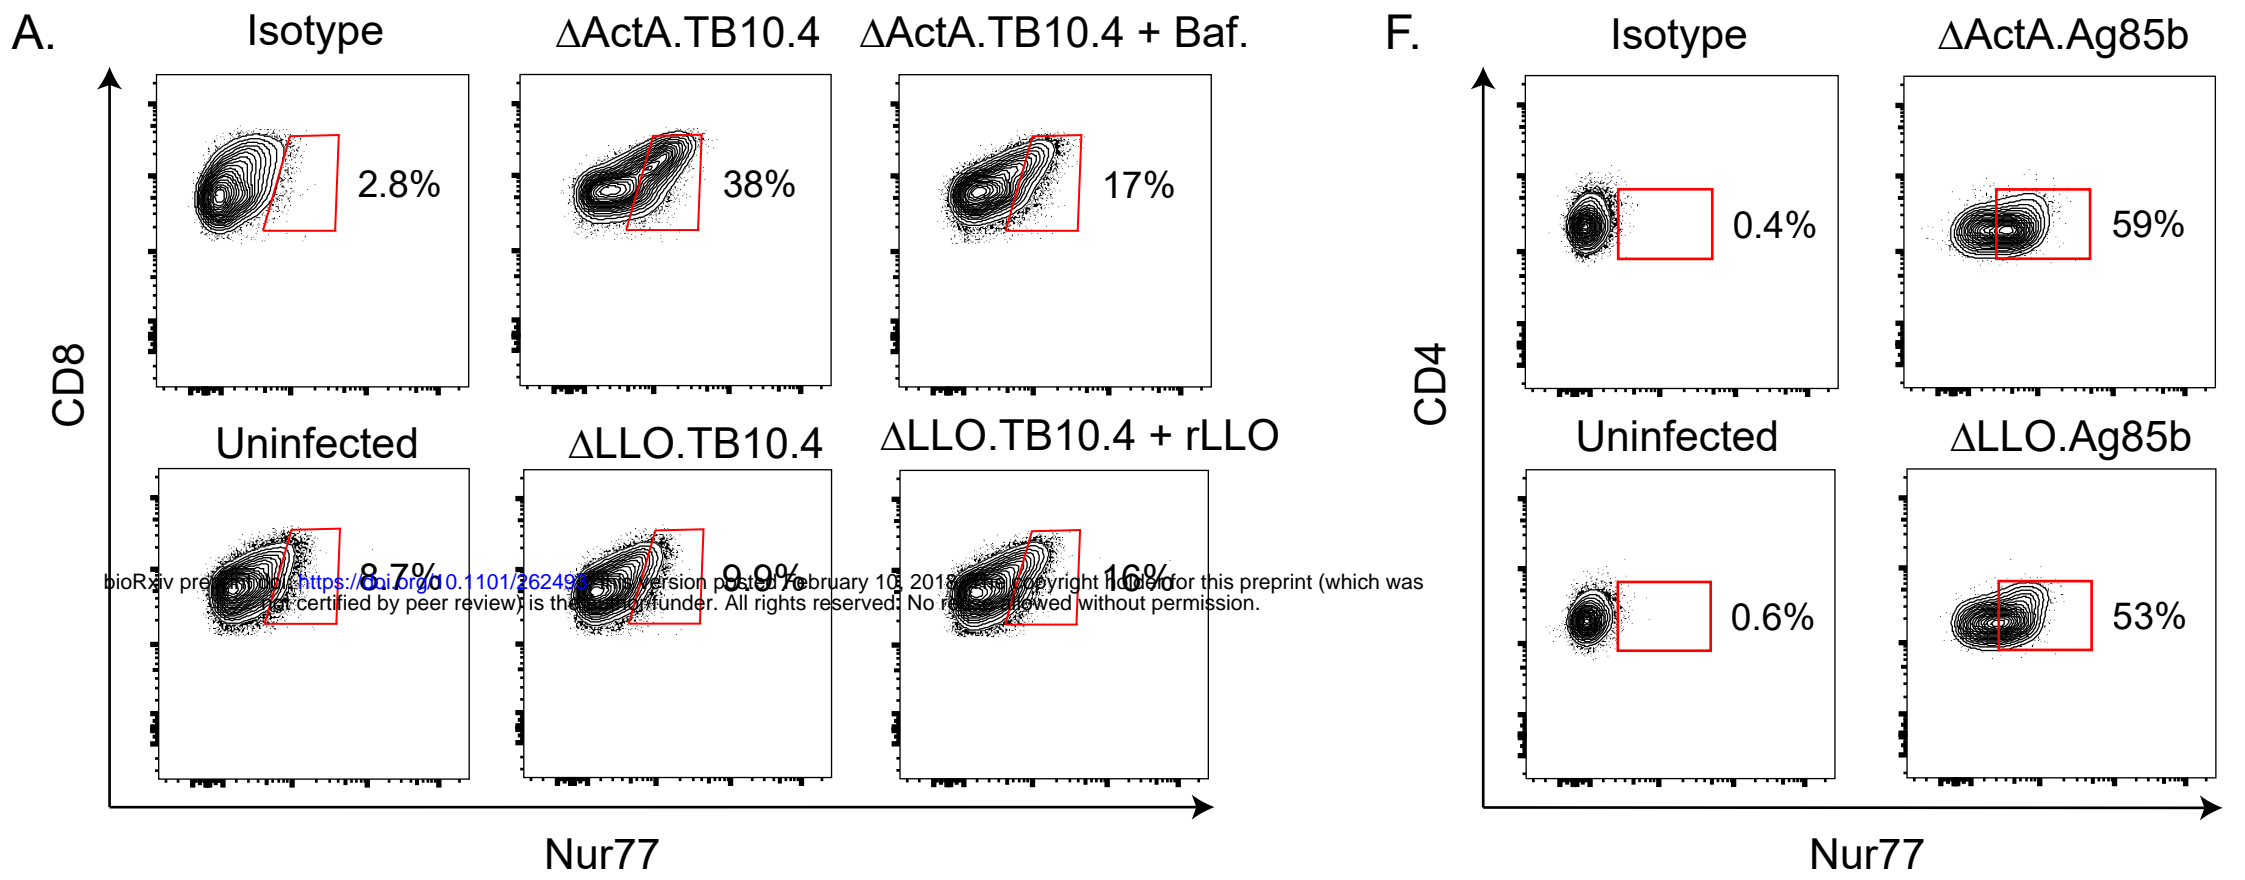

**B. TB10Rg3**

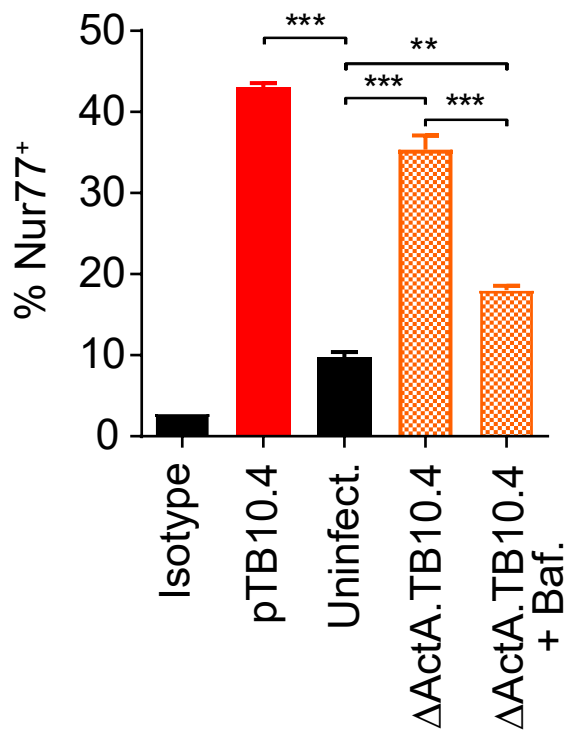

**D. TB10Rg3**

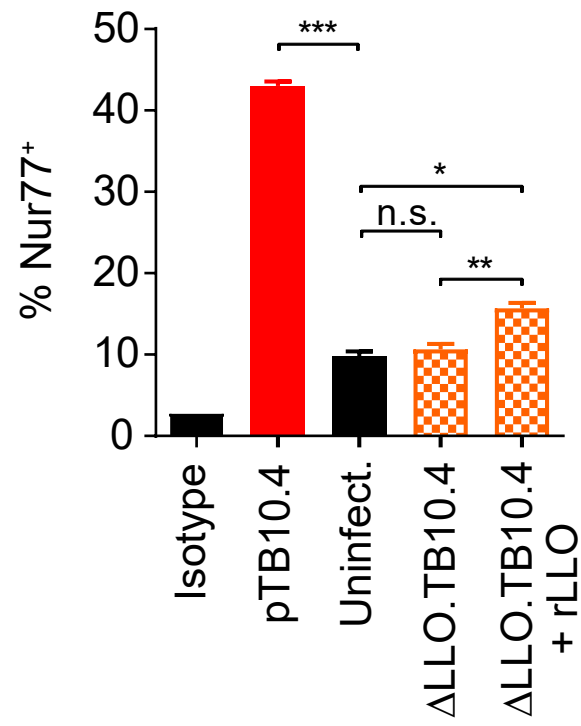

**G.P25**

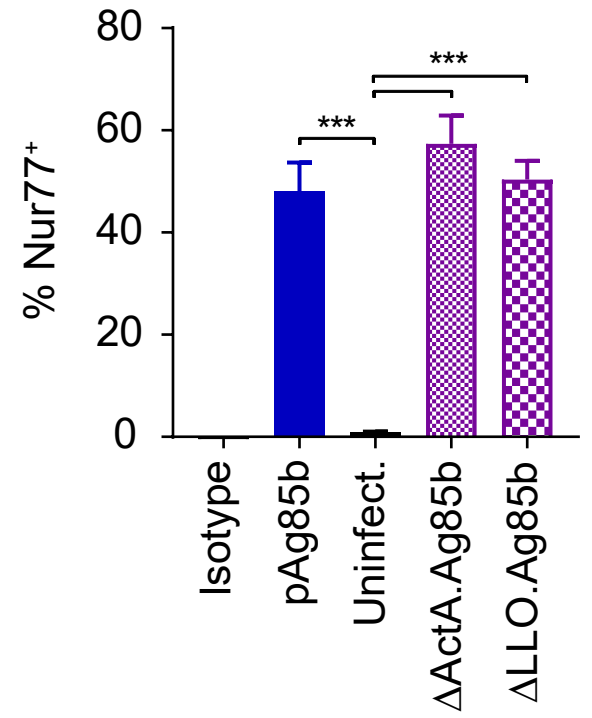

**C.**

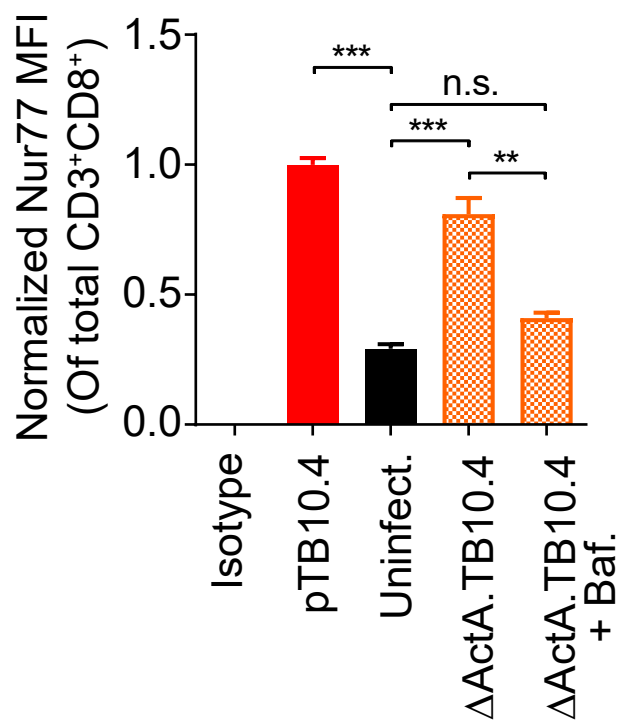

**E.**

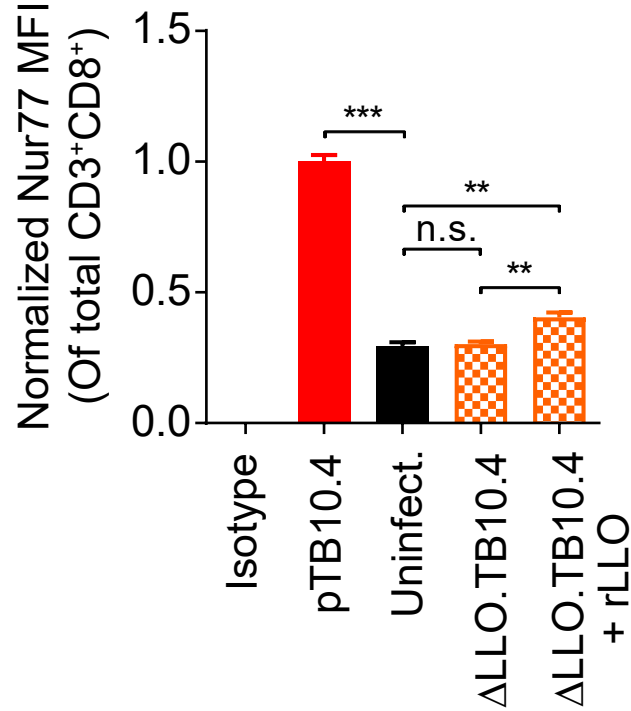

**H.**

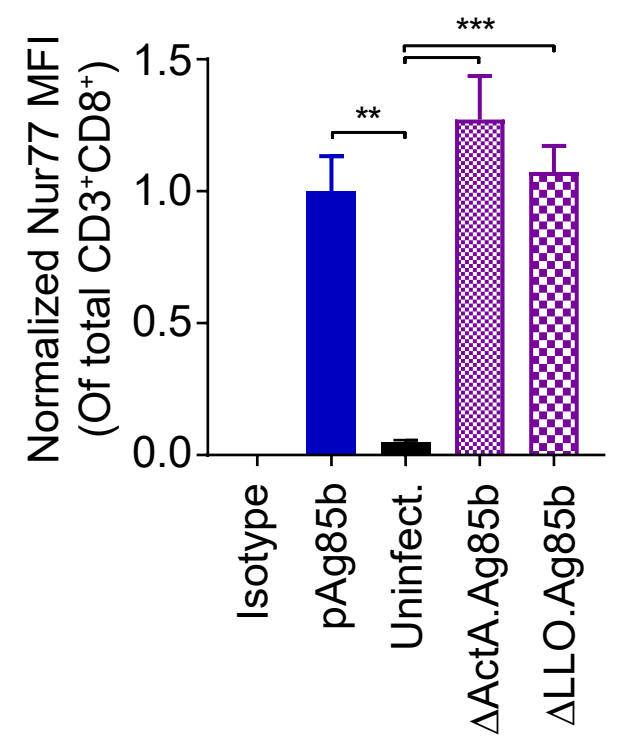

Figure 6.

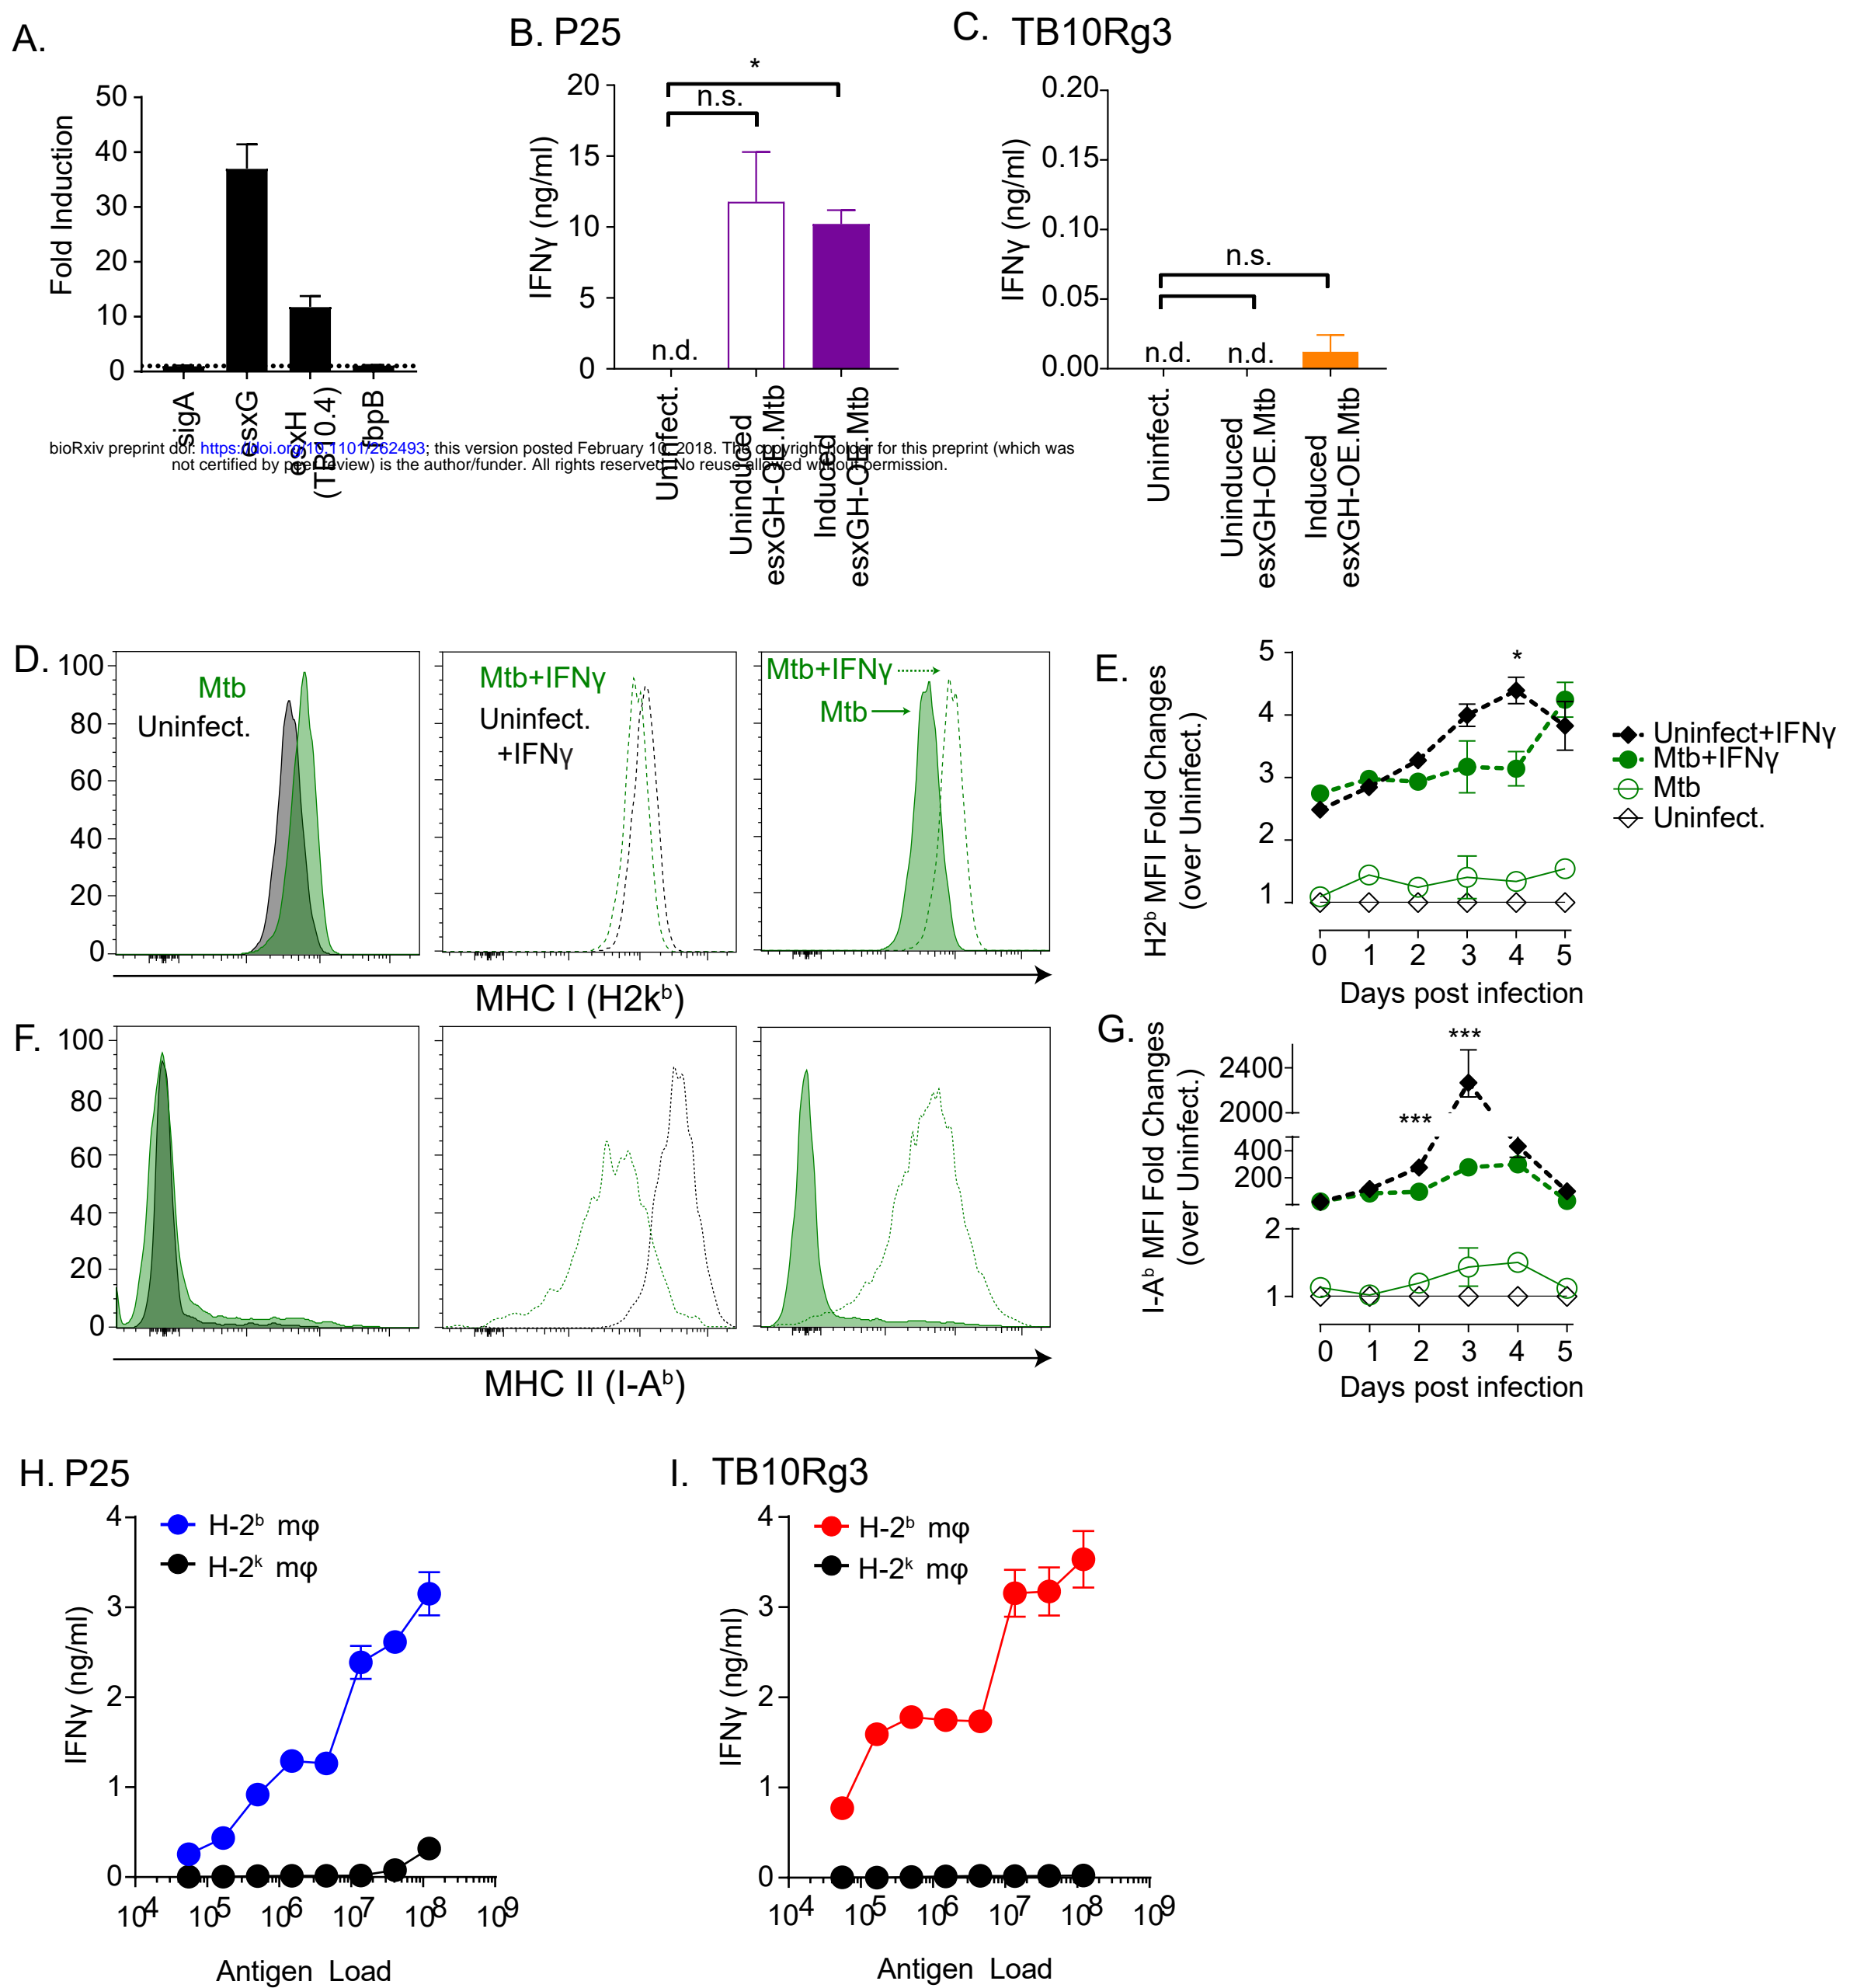

# Figure 7.

## A. Polyclonal CD4<sup>+</sup> T cells

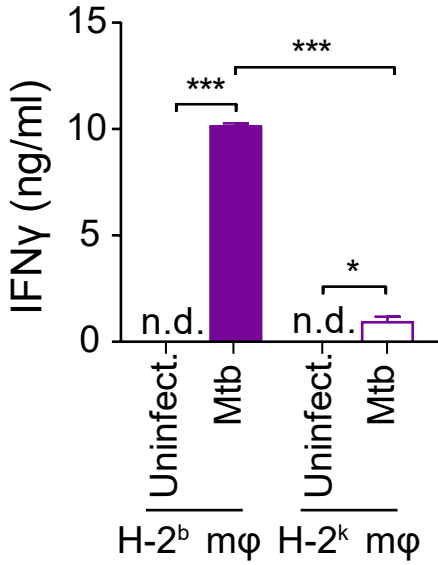

## B. Polyclonal CD8<sup>+</sup> T cells

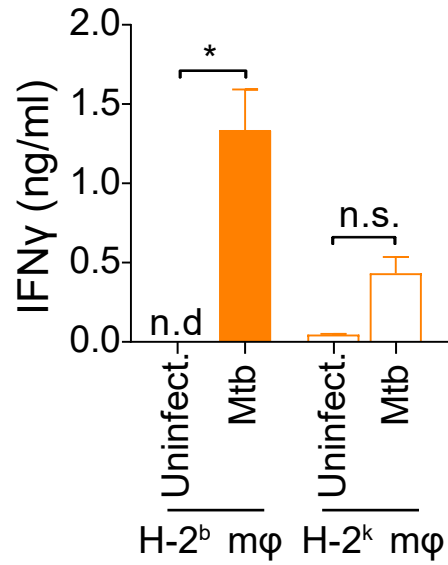

## C. TB10.4<sub>4-11</sub>-tetramer negative, polyclonal CD8<sup>+</sup> T cells

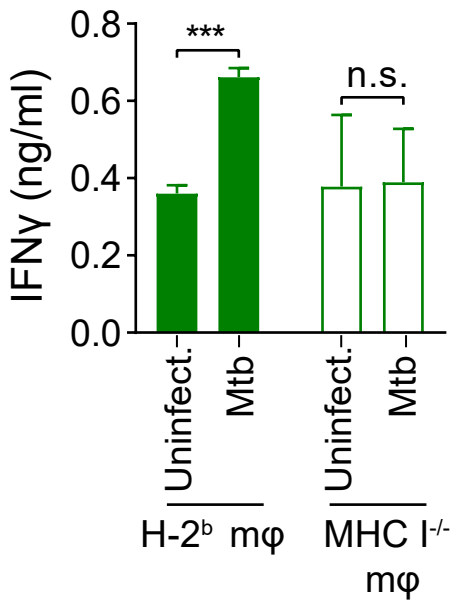

## D. TB10.4<sub>4-11</sub>-tetramer positive CD8<sup>+</sup> T cells

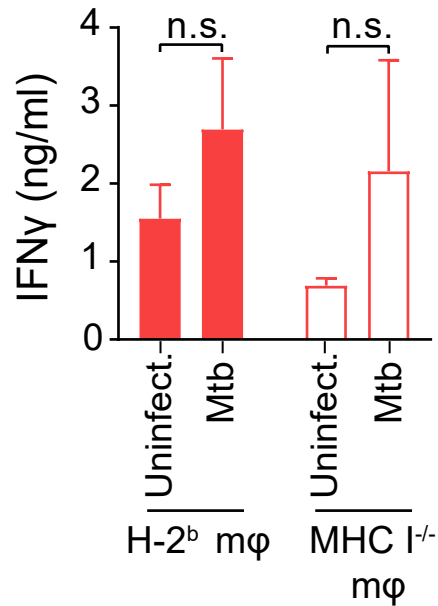

Supplemental Fig. 1

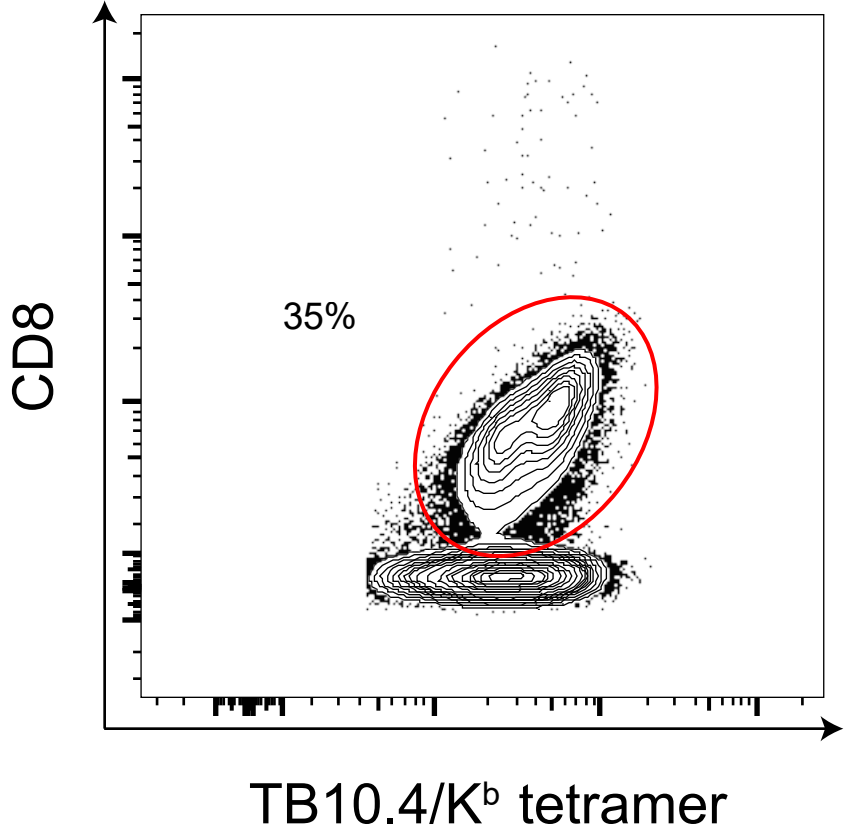

Source: https://www.biorxiv.org/content/10.1101/262493v1.full.pdf
